# Supplementary material for: Ranking Transitive Chemical-Disease Inferences Using Local Network Topology in the Comparative Toxicogenomics Database
Source: PLoS One. 2012 Nov 7;7(11):e46524. doi: 10.1371/journal.pone.0046524 (PMC3492369; doi:10.1371/journal.pone.0046524)
Supplement: Table S1 — Lists of enriched Gene Ontology Biological Process FAT terms with a FDR-adjusted p-value<0.05 for two C–D inferences. A) Enriched terms for 73 genes used to make the curated inference between BPA and breast neoplasms, and B) enriched terms for 43 genes used to make the novel inference between arsenic and breast neoplasms. (XLSX) [file pone.0046524.s004.xlsx]

## Sheet: Sheet1
Supplemental Table S1A
Term	Genes	Count	List Total	Pop Hits	Pop Total	Fold Enrichment	PValue	Bonferroni	Benjamini	FDR
GO:0042981~regulation of apoptosis	CSF2, TNF, PTGS2, HSPA1B, PTEN, AKT1, IGF1R, KRAS, MAP3K1, BCL2, IFNG, TGM2, IL1B, TOP2A, EGFR, TBX3, BCL2A1, PIM1, TP53, ESR1, IGF1, BIRC5, MAL, ESR2, BRCA1, SOD2, IFNB1, JUN	28	72	804	13528	6.54339	1.2375e-15	2.14084e-12	2.14084e-12	2.06501e-12
GO:0043067~regulation of programmed cell death	CSF2, TNF, PTGS2, HSPA1B, PTEN, AKT1, IGF1R, KRAS, MAP3K1, BCL2, IFNG, TGM2, IL1B, TOP2A, EGFR, TBX3, BCL2A1, PIM1, TP53, ESR1, IGF1, BIRC5, MAL, ESR2, BRCA1, SOD2, IFNB1, JUN	28	72	812	13528	6.47893	1.54881e-15	2.72471e-12	1.36235e-12	2.63123e-12
GO:0010941~regulation of cell death	CSF2, TNF, PTGS2, HSPA1B, PTEN, AKT1, IGF1R, KRAS, MAP3K1, BCL2, IFNG, TGM2, IL1B, TOP2A, EGFR, TBX3, BCL2A1, PIM1, TP53, ESR1, IGF1, BIRC5, MAL, ESR2, BRCA1, SOD2, IFNB1, JUN	28	72	815	13528	6.45508	1.79649e-15	3.11395e-12	1.03795e-12	3.0087e-12
GO:0051173~positive regulation of nitrogen compound metabolic process	CSF2, TNF, FHL2, AKT1, FOS, IGF1R, MAP3K1, IFNG, IL1B, EGFR, HSP90AA1, TBX3, TP53, IGF1, ESR2, STAT3, BRCA1, SOD2, RAD51, NCOA1, NCOA2, NCOA3, ETS2, JUN, AREG	25	72	644	13528	7.29382	7.70253e-15	1.34289e-11	3.3572e-12	1.29674e-11
GO:0043066~negative regulation of apoptosis	EGFR, CSF2, TNF, TBX3, BCL2A1, PIM1, TP53, ESR1, IGF1, BIRC5, ESR2, HSPA1B, PTEN, SOD2, AKT1, IGF1R, KRAS, BCL2, TGM2, IL1B	20	72	354	13528	10.6152	1.34578e-14	2.35493e-11	4.7099e-12	2.27374e-11
GO:0043069~negative regulation of programmed cell death	EGFR, CSF2, TNF, TBX3, BCL2A1, PIM1, TP53, ESR1, IGF1, BIRC5, ESR2, HSPA1B, PTEN, SOD2, AKT1, IGF1R, KRAS, BCL2, TGM2, IL1B	20	72	359	13528	10.4673	1.73094e-14	3.0361e-11	5.06017e-12	2.9321e-11
GO:0060548~negative regulation of cell death	EGFR, CSF2, TNF, TBX3, BCL2A1, PIM1, TP53, ESR1, IGF1, BIRC5, ESR2, HSPA1B, PTEN, SOD2, AKT1, IGF1R, KRAS, BCL2, TGM2, IL1B	20	72	360	13528	10.4383	1.82555e-14	3.1918e-11	4.55969e-12	3.08198e-11
GO:0031328~positive regulation of cellular biosynthetic process	EGFR, CSF2, HSP90AA1, TNF, TBX3, TP53, FHL2, IGF1, ESR2, BRCA1, STAT3, SOD2, AKT1, FOS, IGF1R, NCOA1, NCOA2, NCOA3, JUN, ETS2, MAP3K1, IFNG, IL1B, AREG	24	72	685	13528	6.58297	2.94601e-13	5.16527e-10	6.45659e-11	4.98801e-10
GO:0009891~positive regulation of biosynthetic process	EGFR, CSF2, HSP90AA1, TNF, TBX3, TP53, FHL2, IGF1, ESR2, BRCA1, STAT3, SOD2, AKT1, FOS, IGF1R, NCOA1, NCOA2, NCOA3, JUN, ETS2, MAP3K1, IFNG, IL1B, AREG	24	72	695	13528	6.48825	3.9886e-13	6.99277e-10	7.76975e-11	6.75282e-10
GO:0010604~positive regulation of macromolecule metabolic process	CSF2, TNF, FHL2, AKT1, FOS, IGF1R, MAP3K1, BCL2, IFNG, IL1B, TBX3, TP53, ESR1, IGF1, ESR2, UBE2C, STAT3, BRCA1, RAD51, NCOA1, CCND1, NCOA2, NCOA3, ETS2, JUN, AREG	26	72	857	13528	5.70025	4.77554e-13	8.3707e-10	8.37069e-11	8.08353e-10
GO:0051726~regulation of cell cycle	EGFR, TNF, CYP1A1, PTGS2, TBX3, PIM1, TP53, CENPF, IGF1, BIRC5, UBE2C, PTEN, BRCA1, AKT1, CCND1, JUN, BCL2, IL1B	18	72	331	13528	10.2175	8.39145e-13	1.47095e-09	1.33723e-10	1.42049e-09
GO:0006916~anti-apoptosis	CSF2, TNF, TBX3, BCL2A1, ESR1, IGF1, BIRC5, HSPA1B, ESR2, SOD2, AKT1, IGF1R, BCL2, TGM2, IL1B	15	72	206	13528	13.6812	2.59781e-12	4.55396e-09	3.79497e-10	4.3977e-09
GO:0042127~regulation of cell proliferation	EGFR, FGFR2, CSF2, FGFR1, TNF, TBX3, PTGS2, TP53, IGF1, ESR2, PTEN, BRCA1, SOD2, PGR, IGF1R, CCND1, KRAS, IFNB1, JUN, BCL2, IFNG, TGM2, IL1B, NOS2	24	72	787	13528	5.72978	5.23043e-12	9.16884e-09	7.05295e-10	8.85424e-09
GO:0010033~response to organic substance	EGFR, HSP90AA1, TNF, CYP1B1, CYP1A1, PTGS2, ESR1, FHL2, ESR2, HSPA1B, PTEN, BRCA1, STAT3, AKT1, AFP, FOS, IGF1R, CCND1, KRAS, JUN, BCL2, IFNG, IL1B	23	72	721	13528	5.99368	7.40597e-12	1.29827e-08	9.27333e-10	1.25372e-08
GO:0007242~intracellular signaling cascade	FGFR1, TNF, FHL2, RPS6KB2, PGR, AKT1, TYMS, IGF1R, KRAS, MAP3K1, IFNG, TGM2, IL1B, NOS2, TOP2A, EGFR, TP53, ESR1, IGF1, ESR2, UBE2C, BRCA1, STAT3, NCOA1, CCND1, NCOA2, NCOA3, STMN1, BCAR3	29	72	1256	13528	4.3382	8.46055e-12	1.48314e-08	9.88758e-10	1.43225e-08
GO:0045787~positive regulation of cell cycle	EGFR, AKT1, CCND1, TNF, CYP1A1, TBX3, PIM1, IL1B, IGF1, BIRC5	10	72	57	13528	32.963	1.3171e-11	2.30888e-08	1.44305e-09	2.22966e-08
GO:0010557~positive regulation of macromolecule biosynthetic process	CSF2, TNF, TBX3, TP53, FHL2, IGF1, ESR2, BRCA1, STAT3, AKT1, FOS, IGF1R, NCOA1, NCOA2, NCOA3, JUN, ETS2, MAP3K1, IFNG, IL1B, AREG	21	72	654	13528	6.03313	8.0666e-11	1.41407e-07	8.31808e-09	1.36555e-07
GO:0045935~positive regulation of nucleobase, nucleoside, nucleotide and nucleic acid metabolic process	CSF2, TNF, TBX3, TP53, FHL2, IGF1, ESR2, BRCA1, STAT3, RAD51, FOS, IGF1R, NCOA1, NCOA2, NCOA3, JUN, ETS2, MAP3K1, IFNG, AREG	20	72	624	13528	6.02208	2.86862e-10	5.0287e-07	2.79372e-08	4.85615e-07
GO:0045429~positive regulation of nitric oxide biosynthetic process	EGFR, AKT1, HSP90AA1, TNF, IFNG, IL1B, SOD2	7	72	21	13528	62.6296	8.59078e-10	1.50596e-06	7.92612e-08	1.45429e-06
GO:0042493~response to drug	PTGS2, CYP1A1, TP53, CENPF, PTEN, STAT3, SOD2, FOS, CCND1, BCL2, JUN, IL1B, BCAR3	13	72	216	13528	11.3081	1.13146e-09	1.98345e-06	9.91727e-08	1.9154e-06
GO:0008284~positive regulation of cell proliferation	EGFR, FGFR2, CSF2, FGFR1, TNF, PTGS2, TBX3, IGF1, IGF1R, CCND1, KRAS, JUN, BCL2, IFNG, TGM2, IL1B	16	72	414	13528	7.26141	2.87026e-09	5.03155e-06	2.39598e-07	4.85892e-06
GO:0048545~response to steroid hormone stimulus	FOS, CCND1, TNF, KRAS, PTGS2, BCL2, ESR1, IL1B, ESR2, PTEN, STAT3, BRCA1	12	72	192	13528	11.7431	4.31008e-09	7.55554e-06	3.43435e-07	7.29632e-06
GO:0045428~regulation of nitric oxide biosynthetic process	EGFR, AKT1, HSP90AA1, TNF, IFNG, IL1B, SOD2	7	72	27	13528	48.7119	4.57165e-09	8.01406e-06	3.48439e-07	7.73912e-06
GO:0030522~intracellular receptor-mediated signaling pathway	PGR, NCOA1, NCOA2, NCOA3, ESR1, FHL2, NOS2, ESR2, BRCA1	9	72	75	13528	22.5467	4.89521e-09	8.58127e-06	3.57554e-07	8.28686e-06
GO:0009725~response to hormone stimulus	TNF, PTGS2, ESR1, FHL2, ESR2, PTEN, BRCA1, STAT3, AKT1, FOS, IGF1R, CCND1, KRAS, BCL2, IL1B	15	72	367	13528	7.67938	5.41142e-09	9.48618e-06	3.79449e-07	9.16073e-06
GO:0010628~positive regulation of gene expression	CSF2, TNF, TBX3, TP53, ESR1, FHL2, IGF1, ESR2, BRCA1, STAT3, FOS, NCOA1, NCOA2, NCOA3, JUN, ETS2, MAP3K1, IFNG	18	72	581	13528	5.821	5.43799e-09	9.53276e-06	3.66646e-07	9.20571e-06
GO:0007346~regulation of mitotic cell cycle	EGFR, CCND1, TNF, CYP1A1, BCL2, TP53, CENPF, IL1B, IGF1, BIRC5, UBE2C	11	72	152	13528	13.5972	6.11668e-09	1.07225e-05	3.97131e-07	1.03546e-05
GO:0051054~positive regulation of DNA metabolic process	IGF1R, CSF2, JUN, IFNG, IGF1, AREG, BRCA1, RAD51	8	72	56	13528	26.8413	1.53215e-08	2.68582e-05	9.59235e-07	2.5937e-05
GO:0009719~response to endogenous stimulus	TNF, PTGS2, ESR1, FHL2, ESR2, PTEN, BRCA1, STAT3, AKT1, FOS, IGF1R, CCND1, KRAS, BCL2, IL1B	15	72	405	13528	6.95885	1.88966e-08	3.31251e-05	1.14226e-06	3.19891e-05
GO:0045893~positive regulation of transcription, DNA-dependent	TNF, TBX3, TP53, FHL2, IGF1, ESR2, BRCA1, STAT3, FOS, NCOA1, NCOA2, NCOA3, JUN, ETS2, MAP3K1, IFNG	16	72	477	13528	6.30235	1.93465e-08	3.39138e-05	1.13048e-06	3.27507e-05
GO:0030518~steroid hormone receptor signaling pathway	PGR, NCOA1, NCOA2, NCOA3, ESR1, FHL2, ESR2, BRCA1	8	72	58	13528	25.9157	1.96997e-08	3.4533e-05	1.11399e-06	3.33486e-05
GO:0051254~positive regulation of RNA metabolic process	TNF, TBX3, TP53, FHL2, IGF1, ESR2, BRCA1, STAT3, FOS, NCOA1, NCOA2, NCOA3, JUN, ETS2, MAP3K1, IFNG	16	72	481	13528	6.24994	2.16214e-08	3.79016e-05	1.18445e-06	3.66018e-05
GO:0043065~positive regulation of apoptosis	TNF, PTGS2, TP53, MAL, PTEN, BRCA1, AKT1, IFNB1, JUN, BCL2, MAP3K1, IFNG, TGM2, IL1B, TOP2A	15	72	430	13528	6.55426	4.00564e-08	7.02164e-05	2.12784e-06	6.78095e-05
GO:0043068~positive regulation of programmed cell death	TNF, PTGS2, TP53, MAL, PTEN, BRCA1, AKT1, IFNB1, JUN, BCL2, MAP3K1, IFNG, TGM2, IL1B, TOP2A	15	72	433	13528	6.50885	4.36865e-08	7.65795e-05	2.25242e-06	7.39547e-05
GO:0010942~positive regulation of cell death	TNF, PTGS2, TP53, MAL, PTEN, BRCA1, AKT1, IFNB1, JUN, BCL2, MAP3K1, IFNG, TGM2, IL1B, TOP2A	15	72	435	13528	6.47893	4.62697e-08	8.11074e-05	2.31745e-06	7.83276e-05
GO:0012501~programmed cell death	TNF, BCL2A1, TP53, BIRC5, PTEN, BRCA1, SOD2, AKT1, KRAS, IFNB1, JUN, BCL2, MAP3K1, IFNG, TGM2, IL1B, TOP2A	17	72	611	13528	5.22768	7.79236e-08	0.000136591	3.79444e-06	0.000131913
GO:0007568~aging	FOS, KRAS, TBX3, JUN, BCL2, TP53, IL1B, PTEN, SOD2	9	72	110	13528	15.3727	1.02788e-07	0.000180172	4.86993e-06	0.000174005
GO:0048660~regulation of smooth muscle cell proliferation	EGFR, TNF, PTGS2, JUN, IFNG, TGM2, IGF1	7	72	46	13528	28.5918	1.33756e-07	0.000234447	6.17035e-06	0.000226428
GO:0051052~regulation of DNA metabolic process	IGF1R, CSF2, JUN, IFNG, TP53, IGF1, AREG, BRCA1, RAD51	9	72	114	13528	14.8333	1.35795e-07	0.00023802	6.10378e-06	0.00022988
GO:0032768~regulation of monooxygenase activity	EGFR, AKT1, TNF, KRAS, IFNG, IL1B	6	72	25	13528	45.0933	1.69006e-07	0.000296223	7.40665e-06	0.000286101
GO:0045941~positive regulation of transcription	TNF, TBX3, TP53, FHL2, IGF1, ESR2, BRCA1, STAT3, FOS, NCOA1, NCOA2, NCOA3, JUN, ETS2, MAP3K1, IFNG	16	72	564	13528	5.33018	1.74579e-07	0.000305991	7.46431e-06	0.000295537
GO:0009991~response to extracellular stimulus	AKT1, FOS, CCND1, PTGS2, CYP1A1, JUN, BCL2, TP53, IL1B, PTEN, SOD2	11	72	220	13528	9.39444	2.04852e-07	0.000359042	8.55012e-06	0.000346784
GO:0014070~response to organic cyclic substance	FOS, CCND1, PTGS2, CYP1A1, JUN, BCL2, IL1B, PTEN, STAT3	9	72	121	13528	13.9752	2.15645e-07	0.000377954	8.79125e-06	0.000365054
GO:0001932~regulation of protein amino acid phosphorylation	EGFR, CSF2, CCND1, TNF, MAP3K1, JUN, BCL2, IFNG, IL1B, IGF1	10	72	173	13528	10.8606	2.80174e-07	0.000491024	1.11623e-05	0.000474291
GO:0031399~regulation of protein modification process	EGFR, CSF2, CCND1, TNF, MAP3K1, JUN, BCL2, IFNG, IL1B, IGF1, UBE2C, BRCA1	12	72	295	13528	7.64294	3.52395e-07	0.000617557	1.37276e-05	0.00059655
GO:0006915~apoptosis	TNF, BCL2A1, TP53, BIRC5, PTEN, BRCA1, SOD2, AKT1, KRAS, IFNB1, JUN, BCL2, MAP3K1, IFNG, IL1B, TOP2A	16	72	602	13528	4.99372	4.03424e-07	0.000706952	1.53738e-05	0.000682934
GO:0009628~response to abiotic stimulus	EGFR, TNF, TP53, BRCA1, SOD2, AKT1, FOS, CCND1, KRAS, BCL2, MAP3K1, JUN, IL1B	13	72	368	13528	6.63738	4.14058e-07	0.00072558	1.54434e-05	0.000700936
GO:0043523~regulation of neuron apoptosis	TNF, KRAS, JUN, BCL2, ESR1, TP53, ESR2, SOD2	8	72	90	13528	16.7012	4.28642e-07	0.000751127	1.56542e-05	0.000725625
GO:0032770~positive regulation of monooxygenase activity	AKT1, TNF, KRAS, IFNG, IL1B	5	72	13	13528	72.265	4.80577e-07	0.000842097	1.71928e-05	0.000813543
GO:0048661~positive regulation of smooth muscle cell proliferation	EGFR, TNF, PTGS2, JUN, TGM2, IGF1	6	72	31	13528	36.3656	5.27444e-07	0.000924183	1.8492e-05	0.000892881
GO:0008637~apoptotic mitochondrial changes	AKT1, MAP3K1, JUN, BCL2, TP53, SOD2	6	72	31	13528	36.3656	5.27444e-07	0.000924183	1.8492e-05	0.000892881
GO:0008219~cell death	TNF, BCL2A1, TP53, BIRC5, PTEN, BRCA1, SOD2, AKT1, KRAS, IFNB1, JUN, BCL2, MAP3K1, IFNG, TGM2, IL1B, TOP2A	17	72	719	13528	4.44244	7.06524e-07	0.00123777	2.42847e-05	0.00119603
GO:0042327~positive regulation of phosphorylation	EGFR, CSF2, CCND1, TNF, BCL2, IFNG, IL1B, IGF1	8	72	97	13528	15.496	7.15907e-07	0.0012542	2.4134e-05	0.00121192
GO:0042325~regulation of phosphorylation	EGFR, CSF2, TNF, PIM1, IGF1, PTEN, AKT1, CCND1, KRAS, BCL2, MAP3K1, JUN, IFNG, IL1B	14	72	466	13528	5.64473	7.62805e-07	0.0013363	2.52298e-05	0.00129131
GO:0016265~death	TNF, BCL2A1, TP53, BIRC5, PTEN, BRCA1, SOD2, AKT1, KRAS, IFNB1, JUN, BCL2, MAP3K1, IFNG, TGM2, IL1B, TOP2A	17	72	724	13528	4.41176	7.74688e-07	0.00135711	2.51483e-05	0.00131142
GO:0006357~regulation of transcription from RNA polymerase II promoter	TNF, TBX3, FST, TP53, FHL2, IGF1, ESR2, BRCA1, STAT3, SOD2, FOS, NCOA1, NCOA2, JUN, MAP3K1, NCOR1, ENO1	17	72	727	13528	4.39355	8.18395e-07	0.00143362	2.60841e-05	0.00138541
GO:0031667~response to nutrient levels	AKT1, CCND1, PTGS2, CYP1A1, JUN, BCL2, TP53, IL1B, PTEN, SOD2	10	72	197	13528	9.53751	8.38087e-07	0.00146809	2.62348e-05	0.00141875
GO:0010562~positive regulation of phosphorus metabolic process	EGFR, CSF2, CCND1, TNF, BCL2, IFNG, IL1B, IGF1	8	72	100	13528	15.0311	8.81048e-07	0.00154329	2.70957e-05	0.00149147
GO:0045937~positive regulation of phosphate metabolic process	EGFR, CSF2, CCND1, TNF, BCL2, IFNG, IL1B, IGF1	8	72	100	13528	15.0311	8.81048e-07	0.00154329	2.70957e-05	0.00149147
GO:0022402~cell cycle process	EGFR, RAD51C, PIM1, TP53, CENPF, BIRC5, UBE2C, BRCA1, RAD51, AKT1, CCND1, BCL2, IFNG, STMN1, NCOR1	15	72	565	13528	4.9882	1.11764e-06	0.00195731	3.37793e-05	0.00189199
GO:0051174~regulation of phosphorus metabolic process	EGFR, CSF2, TNF, PIM1, IGF1, PTEN, AKT1, CCND1, KRAS, BCL2, MAP3K1, JUN, IFNG, IL1B	14	72	485	13528	5.4236	1.19477e-06	0.00209225	3.54983e-05	0.00202255
GO:0019220~regulation of phosphate metabolic process	EGFR, CSF2, TNF, PIM1, IGF1, PTEN, AKT1, CCND1, KRAS, BCL2, MAP3K1, JUN, IFNG, IL1B	14	72	485	13528	5.4236	1.19477e-06	0.00209225	3.54983e-05	0.00202255
GO:0043627~response to estrogen stimulus	CCND1, PTGS2, BCL2, ESR1, IL1B, PTEN, STAT3, BRCA1	8	72	105	13528	14.3153	1.22702e-06	0.00214865	3.58488e-05	0.00207714
GO:0007167~enzyme linked receptor protein signaling pathway	EGFR, AKT1, FGFR2, IGF1R, FGFR1, FOS, MAP3K1, JUN, FST, AREG, PTEN, STAT3	12	72	342	13528	6.59259	1.51527e-06	0.00265274	4.35443e-05	0.00256509
GO:0044093~positive regulation of molecular function	EGFR, TNF, PIM1, TP53, UBE2C, AKT1, CCND1, KRAS, NCOA3, IFNB1, BCL2, MAP3K1, IFNG, TGM2, IL1B	15	72	586	13528	4.80944	1.72091e-06	0.00301222	4.86563e-05	0.00291321
GO:0051341~regulation of oxidoreductase activity	EGFR, AKT1, TNF, KRAS, IFNG, IL1B	6	72	40	13528	28.1833	1.96917e-06	0.00344601	5.47915e-05	0.00333346
GO:0010564~regulation of cell cycle process	TNF, CYP1A1, CENPF, IL1B, IGF1, BIRC5, UBE2C, BRCA1	8	72	114	13528	13.1852	2.13691e-06	0.00373899	5.85296e-05	0.0036174
GO:0043085~positive regulation of catalytic activity	EGFR, TNF, TP53, PIM1, UBE2C, AKT1, CCND1, KRAS, IFNB1, BCL2, MAP3K1, IFNG, TGM2, IL1B	14	72	520	13528	5.05855	2.59063e-06	0.00453109	6.9865e-05	0.00438546
GO:0051384~response to glucocorticoid stimulus	FOS, CCND1, TNF, KRAS, PTGS2, BCL2, IL1B	7	72	78	13528	16.8618	3.2144e-06	0.00561901	8.53729e-05	0.00544136
GO:0032270~positive regulation of cellular protein metabolic process	AKT1, CSF2, CCND1, TNF, BCL2, IFNG, IL1B, IGF1, UBE2C, BRCA1	10	72	233	13528	8.0639	3.36464e-06	0.00588086	8.80293e-05	0.00569568
GO:0050792~regulation of viral reproduction	TNF, IFNB1, MAP3K1, BCL2, TOP2A	5	72	21	13528	44.7354	3.89711e-06	0.00680836	0.00010046	0.00659701
GO:0051247~positive regulation of protein metabolic process	AKT1, CSF2, CCND1, TNF, BCL2, IFNG, IL1B, IGF1, UBE2C, BRCA1	10	72	243	13528	7.73205	4.74209e-06	0.00827845	0.00012047	0.00802736
GO:0031960~response to corticosteroid stimulus	FOS, CCND1, TNF, KRAS, PTGS2, BCL2, IL1B	7	72	85	13528	15.4732	5.31768e-06	0.0092786	0.000133161	0.00900166
GO:0010627~regulation of protein kinase cascade	AKT1, CSF2, TNF, MAP3K1, IFNG, TGM2, IL1B, IGF1, NCOR1, PTEN	10	72	249	13528	7.54574	5.7818e-06	0.0100843	0.000142744	0.00978728
GO:0031401~positive regulation of protein modification process	CSF2, CCND1, TNF, BCL2, IFNG, IL1B, IGF1, UBE2C, BRCA1	9	72	187	13528	9.04278	5.80432e-06	0.0101234	0.000141309	0.0098254
GO:0032268~regulation of cellular protein metabolic process	EGFR, CSF2, TNF, IGF1, UBE2C, BRCA1, AKT1, CCND1, BCL2, MAP3K1, JUN, IFNG, IL1B	13	72	474	13528	5.15307	5.82018e-06	0.0101509	0.000139755	0.00985224
GO:0033554~cellular response to stress	RAD51C, TNF, TP53, BRCA1, SOD2, RAD51, FOS, TYMS, CCND1, BCL2, MAP3K1, JUN, IFNG, TOP2A	14	72	566	13528	4.64743	6.54107e-06	0.0114011	0.000154941	0.0110725
GO:0001934~positive regulation of protein amino acid phosphorylation	CSF2, CCND1, TNF, BCL2, IFNG, IL1B, IGF1	7	72	89	13528	14.7778	6.95005e-06	0.0121096	0.000162433	0.0117647
GO:0009617~response to bacterium	FOS, TNF, PTGS2, CYP1A1, IFNB1, JUN, IFNG, IL1B, NOS2	9	72	193	13528	8.76166	7.32348e-06	0.0127561	0.000168908	0.0123968
GO:0045737~positive regulation of cyclin-dependent protein kinase activity	EGFR, AKT1, CCND1, PIM1	4	72	8	13528	93.9444	7.61357e-06	0.013258	0.000173318	0.0128879
GO:0010647~positive regulation of cell communication	EGFR, CSF2, TNF, KRAS, PTGS2, NCOA3, IFNG, ESR1, TGM2, IL1B, IGF1	11	72	329	13528	6.282	7.81978e-06	0.0136146	0.00017573	0.0132369
GO:0022403~cell cycle phase	EGFR, AKT1, RAD51C, CCND1, BCL2, PIM1, CENPF, BIRC5, STMN1, UBE2C, NCOR1, RAD51	12	72	414	13528	5.44605	9.47114e-06	0.0164659	0.000210142	0.016032
GO:0009314~response to radiation	EGFR, AKT1, FOS, CCND1, KRAS, BCL2, TP53, BRCA1, SOD2	9	72	200	13528	8.455	9.50868e-06	0.0165306	0.000208338	0.0160956
GO:0051353~positive regulation of oxidoreductase activity	AKT1, TNF, KRAS, IFNG, IL1B	5	72	26	13528	36.1325	9.54362e-06	0.0165909	0.000206522	0.0161547
GO:0010035~response to inorganic substance	EGFR, FOS, CCND1, PTGS2, CYP1A1, JUN, BCL2, PTEN, SOD2	9	72	205	13528	8.24878	1.13868e-05	0.0197633	0.000243399	0.0192744
GO:0045740~positive regulation of DNA replication	IGF1R, CSF2, JUN, IGF1, AREG	5	72	28	13528	33.5516	1.29675e-05	0.0224757	0.000273843	0.0219497
GO:0008283~cell proliferation	EGFR, CYP1A1, IFNB1, BCL2, FST, PIM1, TP53, CENPF, IGF1, NOS2, AREG, PTEN	12	72	436	13528	5.17125	1.53879e-05	0.0266147	0.000321083	0.0260463
GO:0051329~interphase of mitotic cell cycle	EGFR, AKT1, CCND1, BCL2, PIM1, CENPF, BIRC5	7	72	103	13528	12.7691	1.61426e-05	0.0279015	0.000332864	0.0273235
GO:0008285~negative regulation of cell proliferation	TNF, PTGS2, IFNB1, JUN, BCL2, IFNG, TP53, IL1B, ESR2, PTEN, SOD2	11	72	361	13528	5.72515	1.75384e-05	0.0302772	0.000357436	0.0296857
GO:0006275~regulation of DNA replication	IGF1R, CSF2, JUN, TP53, IGF1, AREG	6	72	62	13528	18.1828	1.77086e-05	0.0305666	0.000356758	0.0299738
GO:0051325~interphase	EGFR, AKT1, CCND1, BCL2, PIM1, CENPF, BIRC5	7	72	106	13528	12.4078	1.90228e-05	0.0327974	0.000378875	0.0321979
GO:0007243~protein kinase cascade	EGFR, AKT1, IGF1R, FGFR1, TNF, MAP3K1, IFNG, RPS6KB2, IL1B, NOS2, STAT3	11	72	370	13528	5.58589	2.16792e-05	0.037291	0.000426921	0.0366933
GO:0007611~learning or memory	FOS, KRAS, PTGS2, JUN, IL1B, ESR2, PTEN	7	72	111	13528	11.8488	2.47344e-05	0.0424333	0.000481661	0.0418634
GO:0000060~protein import into nucleus, translocation	AKT1, TNF, JUN, IFNG, TP53	5	72	34	13528	27.6307	2.86817e-05	0.0490367	0.000552373	0.0485428
GO:0007610~behavior	FOS, KRAS, PTGS2, CXCL3, JUN, BCL2, IFNG, IL1B, ESR2, PTEN, STAT3, SOD2	12	72	469	13528	4.80739	3.02206e-05	0.0515987	0.000575677	0.0511467
GO:0019932~second-messenger-mediated signaling	EGFR, IGF1R, TYMS, TNF, TGM2, IGF1, NOS2, UBE2C, TOP2A	9	72	235	13528	7.19574	3.05125e-05	0.0520838	0.000574987	0.0516405
GO:0031331~positive regulation of cellular catabolic process	AKT1, TNF, IFNG, IL1B, IGF1	5	72	36	13528	26.0957	3.61432e-05	0.0613946	0.000673817	0.0611674
GO:0007049~cell cycle	EGFR, RAD51C, PIM1, TP53, CENPF, BIRC5, UBE2C, BRCA1, RAD51, AKT1, CCND1, BCL2, IFNG, STMN1, NCOR1	15	72	776	13528	3.63187	4.20574e-05	0.0710758	0.000775785	0.0711731
GO:0040012~regulation of locomotion	EGFR, AKT1, IGF1R, IFNB1, MAP3K1, BCL2, IGF1, PTEN	8	72	192	13528	7.8287	6.42089e-05	0.106458	0.00117183	0.10864
GO:0003006~reproductive developmental process	PGR, AKT1, IGF1R, AFP, CCND1, PTGS2, TBX3, BCL2, FST	9	72	262	13528	6.4542	6.59198e-05	0.109134	0.00119064	0.111534
GO:0051051~negative regulation of transport	AKT1, TNF, PTGS2, BCL2, FST, IL1B, PTEN	7	72	135	13528	9.74239	7.43404e-05	0.122189	0.00132895	0.125773
GO:0070141~response to UV-A	EGFR, AKT1, CCND1	3	72	3	13528	187.889	8.12013e-05	0.132684	0.00143686	0.137373
GO:0060559~positive regulation of calcidiol 1-monooxygenase activity	TNF, IFNG, IL1B	3	72	3	13528	187.889	8.12013e-05	0.132684	0.00143686	0.137373
GO:0009416~response to light stimulus	EGFR, AKT1, FOS, CCND1, KRAS, BCL2, TP53	7	72	138	13528	9.5306	8.39875e-05	0.13691	0.00147128	0.142083
GO:0007005~mitochondrion organization	AKT1, HSP90AA1, MAP3K1, JUN, BCL2, TP53, SOD2	7	72	138	13528	9.5306	8.39875e-05	0.13691	0.00147128	0.142083
GO:0009611~response to wounding	AKT1, FOS, TNF, CYP1A1, MAP3K1, CXCL3, BCL2, IL1B, IGF1, TFPI2, STAT3, SOD2	12	72	530	13528	4.25409	9.13146e-05	0.147926	0.00158371	0.15447
GO:0048015~phosphoinositide-mediated signaling	IGF1R, TYMS, TGM2, IGF1, UBE2C, TOP2A	6	72	88	13528	12.8106	9.64712e-05	0.155594	0.00165669	0.163186
GO:0009896~positive regulation of catabolic process	AKT1, TNF, IFNG, IL1B, IGF1	5	72	49	13528	19.1723	0.000123489	0.194659	0.00209963	0.208842
GO:0045944~positive regulation of transcription from RNA polymerase II promoter	FOS, NCOA1, TNF, NCOA2, MAP3K1, JUN, TP53, IGF1, ESR2, STAT3	10	72	371	13528	5.06439	0.0001322	0.206865	0.002226	0.223559
GO:0016481~negative regulation of transcription	TNF, NCOA2, TBX3, IFNB1, FST, TP53, CENPF, NCOR1, STAT3, BRCA1, ENO1	11	72	459	13528	4.50278	0.000132397	0.207138	0.0022081	0.223892
GO:0051385~response to mineralocorticoid stimulus	FOS, CCND1, KRAS, BCL2	4	72	20	13528	37.5778	0.000148135	0.228717	0.002447	0.250474
GO:0009967~positive regulation of signal transduction	CSF2, TNF, KRAS, NCOA3, IFNG, ESR1, TGM2, IL1B, IGF1	9	72	295	13528	5.7322	0.000150265	0.231591	0.00245897	0.254071
GO:0031659~positive regulation of cyclin-dependent protein kinase activity during G1/S	EGFR, AKT1, PIM1	3	72	4	13528	140.917	0.000161851	0.247043	0.00262384	0.273636
GO:0031657~regulation of cyclin-dependent protein kinase activity during G1/S	EGFR, AKT1, PIM1	3	72	4	13528	140.917	0.000161851	0.247043	0.00262384	0.273636
GO:0045860~positive regulation of protein kinase activity	EGFR, AKT1, CCND1, TNF, KRAS, MAP3K1, PIM1, IL1B	8	72	223	13528	6.74041	0.000163519	0.249242	0.00262656	0.276453
GO:0006468~protein amino acid phosphorylation	FGFR2, EGFR, FGFR1, TNF, PIM1, RPS6KB2, AKT1, IGF1R, CCND1, BCL2, MAP3K1, IFNG, IL1B	13	72	667	13528	3.662	0.000164747	0.250857	0.00262225	0.278527
GO:0007169~transmembrane receptor protein tyrosine kinase signaling pathway	EGFR, AKT1, FGFR2, IGF1R, FGFR1, AREG, PTEN, STAT3	8	72	224	13528	6.71032	0.000168096	0.255242	0.0026514	0.28418
GO:0045884~regulation of survival gene product expression	AKT1, CSF2, ESR1, ESR2	4	72	21	13528	35.7884	0.000172174	0.260549	0.00269144	0.291066
GO:0001836~release of cytochrome c from mitochondria	JUN, BCL2, TP53, SOD2	4	72	21	13528	35.7884	0.000172174	0.260549	0.00269144	0.291066
GO:0006928~cell motion	NRCAM, TNF, PTGS2, SERPINB5, CXCL3, IFNG, IL1B, IGF1, ESR2, PTEN, STAT3	11	72	475	13528	4.35111	0.000175075	0.2643	0.00271253	0.295962
GO:0000079~regulation of cyclin-dependent protein kinase activity	EGFR, AKT1, CCND1, PIM1, PTEN	5	72	54	13528	17.3971	0.000180717	0.271542	0.00277531	0.305486
GO:0080135~regulation of cellular response to stress	AKT1, TNF, MAP3K1, IL1B, NCOR1, BRCA1	6	72	103	13528	10.945	0.000202855	0.299276	0.00308775	0.342849
GO:0033674~positive regulation of kinase activity	EGFR, AKT1, CCND1, TNF, KRAS, MAP3K1, PIM1, IL1B	8	72	231	13528	6.50697	0.000203126	0.299609	0.00306526	0.343307
GO:0006355~regulation of transcription, DNA-dependent	TNF, TBX3, FST, TP53, ESR1, FHL2, IGF1, ESR2, BRCA1, STAT3, SOD2, PGR, FOS, NCOA1, NCOA2, NCOA3, JUN, ETS2, MAP3K1, IFNG, NCOR1, ENO1	22	72	1773	13528	2.33139	0.000205	0.301906	0.0030671	0.346468
GO:0000082~G1/S transition of mitotic cell cycle	EGFR, AKT1, CCND1, BCL2, PIM1	5	72	56	13528	16.7758	0.000208231	0.30585	0.003089	0.35192
GO:0051789~response to protein stimulus	FOS, CCND1, HSP90AA1, BCL2, IFNG, HSPA1B	6	72	107	13528	10.5358	0.000242384	0.346198	0.00356464	0.409528
GO:0030334~regulation of cell migration	EGFR, AKT1, IGF1R, MAP3K1, BCL2, IGF1, PTEN	7	72	169	13528	7.78238	0.000254554	0.360002	0.00371217	0.430049
GO:0009411~response to UV	EGFR, AKT1, CCND1, BCL2, TP53	5	72	59	13528	15.9228	0.00025499	0.360491	0.00368785	0.430785
GO:0001501~skeletal system development	EGFR, FGFR1, PTGS2, TBX3, ETS2, BCL2, FHL2, IGF1, MMP2	9	72	319	13528	5.30094	0.000256097	0.361731	0.00367353	0.432651
GO:0051347~positive regulation of transferase activity	EGFR, AKT1, CCND1, TNF, KRAS, MAP3K1, PIM1, IL1B	8	72	240	13528	6.26296	0.000256612	0.362307	0.00365103	0.433519
GO:0010212~response to ionizing radiation	CCND1, BCL2, TP53, BRCA1, SOD2	5	72	60	13528	15.6574	0.000272127	0.379422	0.00384022	0.459674
GO:0051252~regulation of RNA metabolic process	TNF, TBX3, FST, TP53, ESR1, FHL2, IGF1, ESR2, BRCA1, STAT3, SOD2, PGR, FOS, NCOA1, NCOA2, NCOA3, JUN, ETS2, MAP3K1, IFNG, NCOR1, ENO1	22	72	1813	13528	2.27995	0.000280312	0.388265	0.00392393	0.473469
GO:0010629~negative regulation of gene expression	TNF, NCOA2, TBX3, IFNB1, FST, TP53, CENPF, NCOR1, STAT3, BRCA1, ENO1	11	72	504	13528	4.10075	0.0002822	0.390287	0.00391902	0.476651
GO:0051240~positive regulation of multicellular organismal process	EGFR, AKT1, TNF, PTGS2, BCL2, FST, IFNG, IL1B	8	72	244	13528	6.16029	0.000283769	0.391962	0.0039098	0.479295
GO:0031329~regulation of cellular catabolic process	AKT1, TNF, IFNG, IL1B, IGF1	5	72	61	13528	15.4007	0.000290077	0.39865	0.00396539	0.489924
GO:0001568~blood vessel development	AKT1, TBX3, JUN, TGM2, IL1B, NOS2, PTEN, MMP2	8	72	245	13528	6.13515	0.000290908	0.399526	0.00394596	0.491324
GO:0045862~positive regulation of proteolysis	AKT1, TNF, IFNG, IL1B	4	72	25	13528	30.0622	0.000293296	0.402036	0.00394776	0.495349
GO:0045934~negative regulation of nucleobase, nucleoside, nucleotide and nucleic acid metabolic process	TNF, NCOA2, TBX3, IFNB1, FST, TP53, CENPF, NCOR1, STAT3, BRCA1, ENO1	11	72	512	13528	4.03668	0.00031996	0.42935	0.00427313	0.540267
GO:0006952~defense response	AKT1, FOS, TNF, IFNB1, CXCL3, BCL2, IFNG, IL1B, HP, NOS2, ESR2, STAT3	12	72	615	13528	3.66612	0.000334258	0.44348	0.00442995	0.564346
GO:0001944~vasculature development	AKT1, TBX3, JUN, TGM2, IL1B, NOS2, PTEN, MMP2	8	72	251	13528	5.98849	0.000336839	0.445993	0.00443059	0.568691
GO:0001503~ossification	EGFR, PTGS2, BCL2, FHL2, IGF1, MMP2	6	72	115	13528	9.8029	0.000338771	0.447867	0.00442278	0.571944
GO:0051172~negative regulation of nitrogen compound metabolic process	TNF, NCOA2, TBX3, IFNB1, FST, TP53, CENPF, NCOR1, STAT3, BRCA1, ENO1	11	72	519	13528	3.98223	0.000356393	0.464668	0.00461795	0.60161
GO:0045732~positive regulation of protein catabolic process	AKT1, TNF, IFNG, IL1B	4	72	27	13528	27.8354	0.000370201	0.477475	0.0047613	0.624851
GO:0046328~regulation of JNK cascade	AKT1, TNF, MAP3K1, IL1B, NCOR1	5	72	65	13528	14.453	0.000370445	0.477698	0.00472973	0.625261
GO:0046883~regulation of hormone secretion	TNF, FST, IFNG, IL1B, NOS2	5	72	66	13528	14.234	0.000392792	0.497771	0.00497814	0.662862
GO:0033273~response to vitamin	CCND1, PTGS2, CYP1A1, BCL2, IL1B	5	72	66	13528	14.234	0.000392792	0.497771	0.00497814	0.662862
GO:0010605~negative regulation of macromolecule metabolic process	TNF, TBX3, FST, TP53, CENPF, UBE2C, STAT3, BRCA1, NCOA2, IFNB1, JUN, NCOR1, ENO1	13	72	734	13528	3.32773	0.000397186	0.501626	0.00499758	0.670253
GO:0040008~regulation of growth	NRCAM, AKT1, BCL2, IFNG, TP53, IGF1, ESR2, STAT3, ENO1	9	72	341	13528	4.95894	0.000400749	0.504731	0.00500638	0.676247
GO:0045833~negative regulation of lipid metabolic process	AKT1, TNF, IL1B, BRCA1	4	72	28	13528	26.8413	0.000413069	0.515317	0.00512343	0.696969
GO:0045859~regulation of protein kinase activity	EGFR, AKT1, CCND1, TNF, KRAS, MAP3K1, PIM1, IL1B, PTEN	9	72	345	13528	4.90145	0.000433096	0.532045	0.00533349	0.730644
GO:0045449~regulation of transcription	TNF, FST, FHL2, PGR, FOS, KRAS, MAP3K1, IFNG, IL1B, ENO1, TBX3, PIM1, ESR1, TP53, IGF1, CENPF, ESR2, STAT3, BRCA1, SOD2, NCOA1, NCOA2, NCOA3, IFNB1, ETS2, JUN, NCOR1	27	72	2601	13528	1.9504	0.000446214	0.542687	0.0054563	0.752695
GO:0018105~peptidyl-serine phosphorylation	AKT1, MAP3K1, BCL2, IFNG	4	72	29	13528	25.9157	0.000459002	0.55283	0.00557341	0.774189
GO:0060348~bone development	EGFR, PTGS2, BCL2, FHL2, IGF1, MMP2	6	72	123	13528	9.16531	0.000461744	0.554975	0.00556805	0.778796
GO:0046545~development of primary female sexual characteristics	PGR, AFP, TBX3, BCL2, FST	5	72	69	13528	13.6151	0.000465611	0.557983	0.00557622	0.785294
GO:0070302~regulation of stress-activated protein kinase signaling pathway	AKT1, TNF, MAP3K1, IL1B, NCOR1	5	72	69	13528	13.6151	0.000465611	0.557983	0.00557622	0.785294
GO:0046660~female sex differentiation	PGR, AFP, TBX3, BCL2, FST	5	72	69	13528	13.6151	0.000465611	0.557983	0.00557622	0.785294
GO:0042592~homeostatic process	ALDOA, TP53, IGF1, HP, MAL, STAT3, SOD2, AKT1, BCL2, JUN, IFNG, TGM2, IL1B	13	72	751	13528	3.2524	0.000488164	0.575125	0.00580595	0.823185
GO:0019221~cytokine-mediated signaling pathway	TNF, KRAS, TGM2, IL1B, STAT3	5	72	70	13528	13.4206	0.000491887	0.57789	0.00581069	0.829437
GO:0051270~regulation of cell motion	EGFR, AKT1, IGF1R, MAP3K1, BCL2, IGF1, PTEN	7	72	193	13528	6.81462	0.000517469	0.596411	0.00607115	0.872398
GO:0032535~regulation of cellular component size	AKT1, FGFR2, FGFR1, MAP3K1, BCL2, TP53, ESR2, ENO1	8	72	271	13528	5.54654	0.000533643	0.607699	0.00621875	0.899548
GO:0045137~development of primary sexual characteristics	PGR, AFP, CCND1, TBX3, BCL2, FST	6	72	127	13528	8.87664	0.000534571	0.608337	0.00618842	0.901107
GO:0010558~negative regulation of macromolecule biosynthetic process	TNF, NCOA2, TBX3, IFNB1, FST, TP53, CENPF, NCOR1, STAT3, BRCA1, ENO1	11	72	547	13528	3.77839	0.000538786	0.611222	0.00619616	0.90818
GO:0043549~regulation of kinase activity	EGFR, AKT1, CCND1, TNF, KRAS, MAP3K1, PIM1, IL1B, PTEN	9	72	357	13528	4.73669	0.000543132	0.614174	0.0062053	0.915475
GO:0045080~positive regulation of chemokine biosynthetic process	TNF, IFNG, IL1B	3	72	7	13528	80.5238	0.000560723	0.625897	0.00636423	0.944994
GO:0060558~regulation of calcidiol 1-monooxygenase activity	TNF, IFNG, IL1B	3	72	7	13528	80.5238	0.000560723	0.625897	0.00636423	0.944994
GO:0010038~response to metal ion	EGFR, CCND1, PTGS2, CYP1A1, BCL2, PTEN	6	72	129	13528	8.73902	0.000574071	0.634553	0.00647337	0.967386
GO:0006970~response to osmotic stress	EGFR, TNF, MAP3K1, TP53	4	72	32	13528	23.4861	0.000616073	0.660509	0.00690113	1.03782
GO:0051094~positive regulation of developmental process	NRCAM, AKT1, CSF2, TNF, JUN, BCL2, FST, IL1B	8	72	278	13528	5.40687	0.000620947	0.6634	0.00691141	1.04599
GO:0031327~negative regulation of cellular biosynthetic process	TNF, NCOA2, TBX3, IFNB1, FST, TP53, CENPF, NCOR1, STAT3, BRCA1, ENO1	11	72	561	13528	3.6841	0.000655742	0.683329	0.00725139	1.1043
GO:0007569~cell aging	KRAS, TBX3, BCL2, TP53	4	72	33	13528	22.7744	0.000675139	0.693923	0.00741838	1.13679
GO:0032583~regulation of gene-specific transcription	TNF, MAP3K1, TP53, IGF1, ESR2, NCOR1	6	72	134	13528	8.41294	0.00068241	0.697802	0.00745131	1.14896
GO:0000278~mitotic cell cycle	EGFR, AKT1, CCND1, BCL2, PIM1, CENPF, BIRC5, STMN1, UBE2C	9	72	370	13528	4.57027	0.000686922	0.700184	0.00745399	1.15652
GO:0048732~gland development	EGFR, PGR, IGF1R, TBX3, BCL2, IGF1	6	72	135	13528	8.35062	0.000705797	0.709949	0.00761101	1.18812
GO:0032496~response to lipopolysaccharide	FOS, PTGS2, CYP1A1, JUN, IL1B	5	72	77	13528	12.2006	0.000706239	0.710174	0.00756921	1.18886
GO:0051338~regulation of transferase activity	EGFR, AKT1, CCND1, TNF, KRAS, MAP3K1, PIM1, IL1B, PTEN	9	72	372	13528	4.5457	0.000711548	0.712861	0.00757959	1.19774
GO:0008361~regulation of cell size	AKT1, FGFR2, FGFR1, BCL2, TP53, ESR2, ENO1	7	72	206	13528	6.38457	0.000729023	0.72153	0.00771821	1.22699
GO:0009890~negative regulation of biosynthetic process	TNF, NCOA2, TBX3, IFNB1, FST, TP53, CENPF, NCOR1, STAT3, BRCA1, ENO1	11	72	573	13528	3.60694	0.000772083	0.741791	0.00812336	1.29902
GO:0034097~response to cytokine stimulus	FOS, PTGS2, JUN, BCL2, STAT3	5	72	79	13528	11.8917	0.000777963	0.744441	0.00813618	1.30885
GO:0007584~response to nutrient	CCND1, PTGS2, CYP1A1, BCL2, IL1B, PTEN	6	72	140	13528	8.05238	0.000831857	0.767497	0.00864605	1.39892
GO:0007059~chromosome segregation	RAD51C, CENPF, BIRC5, TOP2A, BRCA1	5	72	81	13528	11.5981	0.000854692	0.776628	0.0088301	1.43706
GO:0016310~phosphorylation	FGFR2, EGFR, FGFR1, TNF, PIM1, RPS6KB2, AKT1, IGF1R, CCND1, BCL2, MAP3K1, IFNG, IL1B	13	72	800	13528	3.05319	0.000854888	0.776704	0.0087804	1.43739
GO:0030521~androgen receptor signaling pathway	NCOA1, NCOA3, FHL2, BRCA1	4	72	36	13528	20.8765	0.000873626	0.783926	0.00891983	1.46867
GO:0051044~positive regulation of membrane protein ectodomain proteolysis	TNF, IFNG, IL1B	3	72	9	13528	62.6296	0.000954726	0.812586	0.00968785	1.60398
GO:0046777~protein amino acid autophosphorylation	EGFR, AKT1, IGF1R, MAP3K1, PIM1	5	72	85	13528	11.0523	0.00102392	0.834013	0.0103269	1.71928
GO:0006606~protein import into nucleus	AKT1, TNF, JUN, IFNG, TP53	5	72	86	13528	10.9238	0.00106965	0.846813	0.0107242	1.79541
GO:0002237~response to molecule of bacterial origin	FOS, PTGS2, CYP1A1, JUN, IL1B	5	72	86	13528	10.9238	0.00106965	0.846813	0.0107242	1.79541
GO:0018209~peptidyl-serine modification	AKT1, MAP3K1, BCL2, IFNG	4	72	39	13528	19.2707	0.0011057	0.856204	0.0110209	1.85539
GO:0043193~positive regulation of gene-specific transcription	TNF, MAP3K1, TP53, IGF1, ESR2	5	72	87	13528	10.7982	0.00111679	0.858977	0.011068	1.87384
GO:0044057~regulation of system process	EGFR, TNF, KRAS, PTGS2, FST, IFNG, IL1B, NOS2	8	72	309	13528	4.86444	0.00115366	0.867813	0.0113673	1.93513
GO:0051170~nuclear import	AKT1, TNF, JUN, IFNG, TP53	5	72	88	13528	10.6755	0.00116538	0.870504	0.011418	1.95461
GO:0007548~sex differentiation	PGR, AFP, CCND1, TBX3, BCL2, FST	6	72	151	13528	7.46578	0.00116762	0.871012	0.0113763	1.95834
GO:0048524~positive regulation of viral reproduction	IFNB1, MAP3K1, TOP2A	3	72	10	13528	56.3667	0.00118936	0.875841	0.011523	1.99445
GO:0045073~regulation of chemokine biosynthetic process	TNF, IFNG, IL1B	3	72	10	13528	56.3667	0.00118936	0.875841	0.011523	1.99445
GO:0050796~regulation of insulin secretion	TNF, IFNG, IL1B, NOS2	4	72	40	13528	18.7889	0.00119087	0.87617	0.0114743	1.99697
GO:0051098~regulation of binding	TNF, KRAS, NCOA3, BCL2, PIM1, IL1B	6	72	153	13528	7.36819	0.00123809	0.886018	0.0118616	2.07536
GO:0006259~DNA metabolic process	RAD51C, TYMS, FOS, TP53, CENPF, IGF1, TOP2A, BRCA1, SOD2, RAD51	10	72	506	13528	3.71322	0.00126282	0.890861	0.0120316	2.11641
GO:0000075~cell cycle checkpoint	CCND1, TP53, CENPF, BIRC5, BRCA1	5	72	91	13528	10.3236	0.00132002	0.901285	0.0125055	2.21126
GO:0048878~chemical homeostasis	JUN, BCL2, TGM2, TP53, IL1B, IGF1, HP, MAL, STAT3, SOD2	10	72	512	13528	3.6697	0.00137064	0.909678	0.0129125	2.29513
GO:0001942~hair follicle development	AKT1, PTGS2, BCL2, FST	4	72	42	13528	17.8942	0.00137339	0.910114	0.0128692	2.29969
GO:0022405~hair cycle process	AKT1, PTGS2, BCL2, FST	4	72	42	13528	17.8942	0.00137339	0.910114	0.0128692	2.29969
GO:0022404~molting cycle process	AKT1, PTGS2, BCL2, FST	4	72	42	13528	17.8942	0.00137339	0.910114	0.0128692	2.29969
GO:0042303~molting cycle	AKT1, PTGS2, BCL2, FST	4	72	43	13528	17.478	0.00147087	0.924251	0.0137038	2.46101
GO:0042633~hair cycle	AKT1, PTGS2, BCL2, FST	4	72	43	13528	17.478	0.00147087	0.924251	0.0137038	2.46101
GO:0006796~phosphate metabolic process	EGFR, FGFR2, FGFR1, TNF, PIM1, RPS6KB2, PTEN, AKT1, IGF1R, CCND1, BCL2, MAP3K1, IFNG, IL1B	14	72	973	13528	2.70344	0.00148138	0.925636	0.0137282	2.47839
GO:0006793~phosphorus metabolic process	EGFR, FGFR2, FGFR1, TNF, PIM1, RPS6KB2, PTEN, AKT1, IGF1R, CCND1, BCL2, MAP3K1, IFNG, IL1B	14	72	973	13528	2.70344	0.00148138	0.925636	0.0137282	2.47839
GO:0034504~protein localization in nucleus	AKT1, TNF, JUN, IFNG, TP53	5	72	94	13528	9.99409	0.00148847	0.926556	0.0137211	2.49011
GO:0009894~regulation of catabolic process	AKT1, TNF, IFNG, IL1B, IGF1	5	72	96	13528	9.78588	0.00160876	0.940539	0.0147451	2.68878
GO:0046890~regulation of lipid biosynthetic process	AKT1, TNF, IFNG, BRCA1	4	72	45	13528	16.7012	0.00167862	0.947403	0.015301	2.80397
GO:0006979~response to oxidative stress	EGFR, FOS, PTGS2, JUN, BCL2, SOD2	6	72	164	13528	6.87398	0.00168335	0.947838	0.0152646	2.81177
GO:0045885~positive regulation of survival gene product expression	CSF2, ESR1, ESR2	3	72	12	13528	46.9722	0.00173259	0.952158	0.0156272	2.89289
GO:0010039~response to iron ion	CCND1, CYP1A1, BCL2	3	72	12	13528	46.9722	0.00173259	0.952158	0.0156272	2.89289
GO:0045834~positive regulation of lipid metabolic process	AKT1, TNF, IFNG, IL1B	4	72	46	13528	16.3382	0.00178901	0.956672	0.01605	2.98577
GO:0002791~regulation of peptide secretion	TNF, IFNG, IL1B, NOS2	4	72	46	13528	16.3382	0.00178901	0.956672	0.01605	2.98577
GO:0045792~negative regulation of cell size	AKT1, BCL2, TP53, ESR2, ENO1	5	72	99	13528	9.48934	0.00180166	0.957623	0.0160803	3.00656
GO:0010740~positive regulation of protein kinase cascade	CSF2, TNF, IFNG, TGM2, IL1B, IGF1	6	72	167	13528	6.7505	0.00182291	0.959176	0.0161864	3.04152
GO:0021700~developmental maturation	NRCAM, PGR, AKT1, PTGS2, MMP2	5	72	101	13528	9.30143	0.00193882	0.966695	0.0171211	3.23194
GO:0043406~positive regulation of MAP kinase activity	EGFR, TNF, KRAS, MAP3K1, IL1B	5	72	102	13528	9.21024	0.00201005	0.970612	0.0176562	3.34878
GO:0051043~regulation of membrane protein ectodomain proteolysis	TNF, IFNG, IL1B	3	72	13	13528	43.359	0.00204067	0.972151	0.0178337	3.39896
GO:0050995~negative regulation of lipid catabolic process	AKT1, TNF, IL1B	3	72	13	13528	43.359	0.00204067	0.972151	0.0178337	3.39896
GO:0051090~regulation of transcription factor activity	TNF, KRAS, NCOA3, PIM1, IL1B	5	72	103	13528	9.12082	0.00208307	0.974149	0.0181111	3.46842
GO:0051259~protein oligomerization	IGF1R, MAP3K1, TGM2, TP53, SOD2, RAD51	6	72	174	13528	6.47893	0.00218141	0.978251	0.0188655	3.62934
GO:0030728~ovulation	PGR, AFP, PTGS2	3	72	14	13528	40.2619	0.00237271	0.98446	0.0204043	3.94164
GO:0045069~regulation of viral genome replication	TNF, BCL2, TOP2A	3	72	14	13528	40.2619	0.00237271	0.98446	0.0204043	3.94164
GO:0051345~positive regulation of hydrolase activity	EGFR, TNF, IFNB1, IFNG, TGM2, TP53	6	72	179	13528	6.29795	0.00246725	0.986838	0.0211063	4.09562
GO:0042176~regulation of protein catabolic process	AKT1, TNF, IFNG, IL1B	4	72	52	13528	14.453	0.00254671	0.988554	0.0216738	4.22486
GO:0043408~regulation of MAPKKK cascade	AKT1, TNF, MAP3K1, IL1B, NCOR1	5	72	109	13528	8.61876	0.00256009	0.98882	0.0216815	4.24661
GO:0009615~response to virus	TNF, CYP1A1, IFNB1, BCL2, IFNG	5	72	109	13528	8.61876	0.00256009	0.98882	0.0216815	4.24661
GO:0045892~negative regulation of transcription, DNA-dependent	TNF, NCOA2, TBX3, FST, TP53, NCOR1, STAT3, ENO1	8	72	356	13528	4.22222	0.0025827	0.989255	0.0217661	4.28335
GO:0007166~cell surface receptor linked signal transduction	EGFR, FGFR2, FGFR1, CXCL3, FST, AKAP12, EVL, PTEN, STAT3, AKT1, FOS, IGF1R, CCND1, IFNB1, JUN, MAP3K1, IFNG, TGM2, AREG, NOS2	20	72	1856	13528	2.02466	0.00265111	0.990472	0.0222302	4.39441
GO:0000122~negative regulation of transcription from RNA polymerase II promoter	TNF, NCOA2, FST, TP53, NCOR1, STAT3, ENO1	7	72	266	13528	4.94444	0.00268715	0.991057	0.0224223	4.45289
GO:0030162~regulation of proteolysis	AKT1, TNF, IFNG, IL1B	4	72	53	13528	14.1803	0.00268943	0.991093	0.022335	4.45659
GO:0001889~liver development	AFP, CCND1, CYP1A1, SOD2	4	72	53	13528	14.1803	0.00268943	0.991093	0.022335	4.45659
GO:0040007~growth	AKT1, FGFR2, FGFR1, PTGS2, BCL2, IGF1	6	72	183	13528	6.16029	0.00271484	0.991482	0.0224377	4.49778
GO:0032642~regulation of chemokine production	TNF, IFNG, IL1B	3	72	15	13528	37.5778	0.00272848	0.991684	0.0224436	4.51989
GO:0008406~gonad development	PGR, AFP, CCND1, BCL2, FST	5	72	112	13528	8.3879	0.00282465	0.992977	0.0231183	4.67564
GO:0019216~regulation of lipid metabolic process	AKT1, TNF, IFNG, IL1B, BRCA1	5	72	112	13528	8.3879	0.00282465	0.992977	0.0231183	4.67564
GO:0051253~negative regulation of RNA metabolic process	TNF, NCOA2, TBX3, FST, TP53, NCOR1, STAT3, ENO1	8	72	362	13528	4.15224	0.00283497	0.993104	0.0230942	4.69233
GO:0032355~response to estradiol stimulus	PTGS2, IL1B, PTEN, STAT3	4	72	54	13528	13.9177	0.00283701	0.993128	0.0230039	4.69563
GO:0019725~cellular homeostasis	ALDOA, JUN, BCL2, TGM2, TP53, IL1B, HP, MAL, SOD2	9	72	466	13528	3.62876	0.00296427	0.994506	0.0239144	4.90133
GO:0050999~regulation of nitric-oxide synthase activity	EGFR, AKT1, KRAS	3	72	16	13528	35.2292	0.00310771	0.995731	0.0249442	5.13267
GO:0051412~response to corticosterone stimulus	FOS, CCND1, BCL2	3	72	16	13528	35.2292	0.00310771	0.995731	0.0249442	5.13267
GO:0007088~regulation of mitosis	TNF, CENPF, IL1B, IGF1	4	72	56	13528	13.4206	0.00314691	0.996015	0.0251405	5.1958
GO:0051783~regulation of nuclear division	TNF, CENPF, IL1B, IGF1	4	72	56	13528	13.4206	0.00314691	0.996015	0.0251405	5.1958
GO:0006260~DNA replication	TYMS, CENPF, IGF1, TOP2A, BRCA1, RAD51	6	72	190	13528	5.93333	0.00319083	0.996311	0.0253719	5.26648
GO:0016477~cell migration	NRCAM, TNF, CXCL3, IFNG, IL1B, ESR2, PTEN	7	72	276	13528	4.7653	0.00322543	0.996529	0.0255284	5.32214
GO:0050900~leukocyte migration	TNF, CXCL3, IFNG, IL1B	4	72	57	13528	13.1852	0.00330934	0.997005	0.0260674	5.45698
GO:0006974~response to DNA damage stimulus	RAD51C, TYMS, CCND1, TP53, TOP2A, BRCA1, SOD2, RAD51	8	72	373	13528	4.02979	0.00334633	0.997194	0.0262376	5.51634
GO:0006873~cellular ion homeostasis	JUN, BCL2, TGM2, TP53, IL1B, HP, MAL, SOD2	8	72	374	13528	4.01901	0.0033961	0.997429	0.026505	5.59619
GO:0001558~regulation of cell growth	NRCAM, AKT1, BCL2, TP53, ESR2, ENO1	6	72	194	13528	5.811	0.00348843	0.997814	0.0270966	5.74414
GO:0055082~cellular chemical homeostasis	JUN, BCL2, TGM2, TP53, IL1B, HP, MAL, SOD2	8	72	380	13528	3.95556	0.00370675	0.998512	0.0286442	6.0931
GO:0006281~DNA repair	RAD51C, TYMS, TP53, TOP2A, BRCA1, SOD2, RAD51	7	72	284	13528	4.63106	0.00371115	0.998523	0.0285523	6.10013
GO:0051101~regulation of DNA binding	TNF, KRAS, NCOA3, PIM1, IL1B	5	72	121	13528	7.764	0.00372974	0.998571	0.0285683	6.12978
GO:0043933~macromolecular complex subunit organization	IGF1R, HSP90AA1, OCLN, MAP3K1, TGM2, TP53, CENPF, EVL, STMN1, SOD2, RAD51	11	72	710	13528	2.91095	0.00377659	0.998684	0.028797	6.20448
GO:0051091~positive regulation of transcription factor activity	TNF, KRAS, NCOA3, IL1B	4	72	60	13528	12.5259	0.00382719	0.998796	0.0290518	6.28509
GO:0048609~reproductive process in a multicellular organism	EGFR, PGR, AKT1, RAD51C, AFP, PTGS2, CYP1A1, BCL2, FST	9	72	487	13528	3.47228	0.00387534	0.998894	0.029286	6.36174
GO:0032504~multicellular organism reproduction	EGFR, PGR, AKT1, RAD51C, AFP, PTGS2, CYP1A1, BCL2, FST	9	72	487	13528	3.47228	0.00387534	0.998894	0.029286	6.36174
GO:0030593~neutrophil chemotaxis	CXCL3, IFNG, IL1B	3	72	18	13528	31.3148	0.00393557	0.999005	0.0296079	6.45754
GO:0040014~regulation of multicellular organism growth	AKT1, BCL2, IGF1, STAT3	4	72	61	13528	12.3206	0.00401014	0.999127	0.0300329	6.57603
GO:0009636~response to toxin	TYMS, FOS, CYP1A1, BCL2	4	72	61	13528	12.3206	0.00401014	0.999127	0.0300329	6.57603
GO:0006302~double-strand break repair	TP53, BRCA1, SOD2, RAD51	4	72	62	13528	12.1219	0.00419834	0.999373	0.0312896	6.87442
GO:0048608~reproductive structure development	PGR, AFP, CCND1, BCL2, FST	5	72	126	13528	7.45591	0.00430909	0.999484	0.0319678	7.0496
GO:0030879~mammary gland development	PGR, IGF1R, TBX3, IGF1	4	72	63	13528	11.9295	0.00439184	0.999554	0.032436	7.18027
GO:0048511~rhythmic process	EGFR, PGR, AFP, JUN, BCL2	5	72	128	13528	7.33941	0.00455693	0.999667	0.0334966	7.44049
GO:0045471~response to ethanol	CCND1, BCL2, PTEN, STAT3	4	72	64	13528	11.7431	0.00459066	0.999686	0.0336003	7.49357
GO:0008585~female gonad development	PGR, AFP, BCL2, FST	4	72	64	13528	11.7431	0.00459066	0.999686	0.0336003	7.49357
GO:0007292~female gamete generation	PGR, AFP, PTGS2, BCL2	4	72	65	13528	11.5624	0.00479487	0.999781	0.0349266	7.8143
GO:0070271~protein complex biogenesis	IGF1R, HSP90AA1, OCLN, MAP3K1, TGM2, TP53, CENPF, SOD2, RAD51	9	72	505	13528	3.34851	0.00481769	0.999789	0.0349455	7.85009
GO:0006461~protein complex assembly	IGF1R, HSP90AA1, OCLN, MAP3K1, TGM2, TP53, CENPF, SOD2, RAD51	9	72	505	13528	3.34851	0.00481769	0.999789	0.0349455	7.85009
GO:0045913~positive regulation of carbohydrate metabolic process	AKT1, IFNG, IGF1	3	72	20	13528	28.1833	0.00485432	0.999803	0.0350624	7.90749
GO:0010676~positive regulation of cellular carbohydrate metabolic process	AKT1, IFNG, IGF1	3	72	20	13528	28.1833	0.00485432	0.999803	0.0350624	7.90749
GO:0017038~protein import	AKT1, TNF, JUN, IFNG, TP53	5	72	131	13528	7.17133	0.00494645	0.999832	0.0355713	8.05171
GO:0006800~oxygen and reactive oxygen species metabolic process	CYP1A1, BCL2, NOS2, SOD2	4	72	67	13528	11.2172	0.00521957	0.999896	0.0373505	8.47801
GO:0042698~ovulation cycle	EGFR, PGR, AFP, BCL2	4	72	67	13528	11.2172	0.00521957	0.999896	0.0373505	8.47801
GO:0046889~positive regulation of lipid biosynthetic process	AKT1, TNF, IFNG	3	72	21	13528	26.8413	0.00534718	0.999917	0.0380933	8.67656
GO:0001666~response to hypoxia	CYP1A1, BCL2, NOS2, MMP2, SOD2	5	72	134	13528	7.01078	0.00535778	0.999919	0.0380135	8.69302
GO:0006605~protein targeting	AKT1, TNF, JUN, IFNG, AKAP12, TP53	6	72	215	13528	5.24341	0.00538714	0.999923	0.0380648	8.73865
GO:0048870~cell motility	NRCAM, TNF, CXCL3, IFNG, IL1B, ESR2, PTEN	7	72	307	13528	4.28411	0.00541193	0.999926	0.0380839	8.77715
GO:0051674~localization of cell	NRCAM, TNF, CXCL3, IFNG, IL1B, ESR2, PTEN	7	72	307	13528	4.28411	0.00541193	0.999926	0.0380839	8.77715
GO:0050730~regulation of peptidyl-tyrosine phosphorylation	EGFR, CSF2, IFNG, IGF1	4	72	68	13528	11.0523	0.00544015	0.99993	0.0381266	8.82095
GO:0045596~negative regulation of cell differentiation	CCND1, TBX3, FST, TP53, IGF1, SOD2	6	72	216	13528	5.21914	0.00549269	0.999936	0.0383358	8.90245
GO:0050801~ion homeostasis	JUN, BCL2, TGM2, TP53, IL1B, HP, MAL, SOD2	8	72	409	13528	3.67509	0.00552469	0.999939	0.038403	8.95207
GO:0033043~regulation of organelle organization	TNF, MAP3K1, CENPF, IL1B, IGF1, BRCA1	6	72	217	13528	5.19508	0.00559969	0.999947	0.0387623	9.06824
GO:0031099~regeneration	AFP, CCND1, BCL2, IGF1	4	72	69	13528	10.8921	0.00566627	0.999953	0.0390615	9.17124
GO:0030155~regulation of cell adhesion	TNF, BCL2, TGM2, IL1B, PTEN	5	72	137	13528	6.85726	0.00579143	0.999962	0.0397536	9.3646
GO:0043525~positive regulation of neuron apoptosis	TNF, JUN, TP53	3	72	22	13528	25.6212	0.00586204	0.999967	0.0400733	9.4735
GO:0043388~positive regulation of DNA binding	TNF, KRAS, NCOA3, IL1B	4	72	70	13528	10.7365	0.00589795	0.999969	0.0401584	9.52885
GO:0032880~regulation of protein localization	AKT1, TNF, BCL2, IFNG, IL1B	5	72	138	13528	6.80757	0.00594104	0.999971	0.0402907	9.59521
GO:0006986~response to unfolded protein	CCND1, HSP90AA1, IFNG, HSPA1B	4	72	71	13528	10.5853	0.00613525	0.999979	0.0414243	9.89374
GO:0050678~regulation of epithelial cell proliferation	EGFR, PGR, IGF1, ESR2	4	72	71	13528	10.5853	0.00613525	0.999979	0.0414243	9.89374
GO:0042531~positive regulation of tyrosine phosphorylation of STAT protein	CSF2, IFNG, IGF1	3	72	23	13528	24.5072	0.00639866	0.999987	0.0430045	10.2972
GO:0010332~response to gamma radiation	BCL2, TP53, SOD2	3	72	23	13528	24.5072	0.00639866	0.999987	0.0430045	10.2972
GO:0043271~negative regulation of ion transport	TNF, PTGS2, BCL2	3	72	23	13528	24.5072	0.00639866	0.999987	0.0430045	10.2972
GO:0070482~response to oxygen levels	CYP1A1, BCL2, NOS2, MMP2, SOD2	5	72	141	13528	6.66273	0.0064053	0.999987	0.0428844	10.3073
GO:0043405~regulation of MAP kinase activity	EGFR, TNF, KRAS, MAP3K1, IL1B	5	72	141	13528	6.66273	0.0064053	0.999987	0.0428844	10.3073
GO:0006917~induction of apoptosis	TNF, IFNB1, TGM2, TP53, MAL, PTEN, BRCA1	7	72	320	13528	4.11007	0.00659547	0.999991	0.043966	10.5975
GO:0012502~induction of programmed cell death	TNF, IFNB1, TGM2, TP53, MAL, PTEN, BRCA1	7	72	321	13528	4.09727	0.00669372	0.999992	0.04444	10.747
GO:0000302~response to reactive oxygen species	FOS, JUN, BCL2, SOD2	4	72	75	13528	10.0207	0.00714122	0.999997	0.0471722	11.4253
GO:0033365~protein localization in organelle	AKT1, TNF, JUN, IFNG, TP53	5	72	146	13528	6.43455	0.00723162	0.999997	0.0475784	11.5617
GO:0051969~regulation of transmission of nerve impulse	EGFR, TNF, KRAS, PTGS2, IFNG	5	72	147	13528	6.39078	0.00740493	0.999998	0.0485133	11.8227
GO:0000279~M phase	RAD51C, CENPF, BIRC5, STMN1, UBE2C, NCOR1, RAD51	7	72	329	13528	3.99764	0.0075186	0.999998	0.0490595	11.9935
GO:0051785~positive regulation of nuclear division	TNF, IL1B, IGF1	3	72	25	13528	22.5467	0.00753624	0.999998	0.0489905	12.02
GO:0045840~positive regulation of mitosis	TNF, IL1B, IGF1	3	72	25	13528	22.5467	0.00753624	0.999998	0.0489905	12.02
GO:0007010~cytoskeleton organization	ALDOA, KRAS, BCL2, EVL, STMN1, UBE2C, NCOR1, BRCA1	8	72	436	13528	3.4475	0.00775694	0.999999	0.0502086	12.3506
GO:0030182~neuron differentiation	EGFR, NRCAM, IGF1R, FGFR1, BCL2, PTEN, STAT3, SOD2	8	72	438	13528	3.43176	0.00794547	0.999999	0.0512136	12.6321
GO:0051099~positive regulation of binding	TNF, KRAS, NCOA3, IL1B	4	72	78	13528	9.63533	0.00795622	0.999999	0.0510943	12.6481
GO:0046427~positive regulation of JAK-STAT cascade	CSF2, IFNG, IGF1	3	72	26	13528	21.6795	0.00813673	0.999999	0.0520376	12.9168
GO:0050994~regulation of lipid catabolic process	AKT1, TNF, IL1B	3	72	26	13528	21.6795	0.00813673	0.999999	0.0520376	12.9168
GO:0043281~regulation of caspase activity	TNF, IFNB1, TP53, BIRC5	4	72	79	13528	9.51336	0.00823957	0.999999	0.0524897	13.0695
GO:0051336~regulation of hydrolase activity	EGFR, TNF, IFNB1, IFNG, TGM2, TP53, BIRC5	7	72	337	13528	3.90274	0.00841488	1	0.0533876	13.3293
GO:0031644~regulation of neurological system process	EGFR, TNF, KRAS, PTGS2, IFNG	5	72	153	13528	6.14016	0.00850264	1	0.0537379	13.4591
GO:0048666~neuron development	EGFR, NRCAM, IGF1R, FGFR1, BCL2, PTEN, SOD2	7	72	339	13528	3.87971	0.00865049	1	0.0544549	13.6772
GO:0045786~negative regulation of cell cycle	EGFR, BCL2, TP53, CENPF	4	72	81	13528	9.27846	0.00882397	1	0.0553231	13.9326
GO:0006913~nucleocytoplasmic transport	AKT1, TNF, JUN, IFNG, TP53	5	72	156	13528	6.02208	0.00908945	1	0.0567449	14.322
GO:0052548~regulation of endopeptidase activity	TNF, IFNB1, TP53, BIRC5	4	72	82	13528	9.16531	0.00912507	1	0.0567606	14.3742
GO:0010638~positive regulation of organelle organization	TNF, MAP3K1, IL1B, IGF1	4	72	83	13528	9.05489	0.00943214	1	0.0584163	14.8222
GO:0009266~response to temperature stimulus	AKT1, FOS, BCL2, IL1B	4	72	83	13528	9.05489	0.00943214	1	0.0584163	14.8222
GO:0051169~nuclear transport	AKT1, TNF, JUN, IFNG, TP53	5	72	158	13528	5.94585	0.00949501	1	0.0585899	14.9137
GO:0010648~negative regulation of cell communication	AKT1, CCND1, PTGS2, IL1B, NCOR1, PTEN	6	72	248	13528	4.5457	0.00969724	1	0.059597	15.2073
GO:0019953~sexual reproduction	PGR, AKT1, RAD51C, AFP, PTGS2, BCL2, FST, STAT3	8	72	458	13528	3.2819	0.0100228	1	0.0613313	15.678
GO:0052547~regulation of peptidase activity	TNF, IFNB1, TP53, BIRC5	4	72	86	13528	8.73902	0.0103894	1	0.0632934	16.205
GO:0060557~positive regulation of vitamin D biosynthetic process	TNF, IFNG	2	72	2	13528	187.889	0.0104696	1	0.0635491	16.3199
GO:0002439~chronic inflammatory response to antigenic stimulus	TNF, IL1B	2	72	2	13528	187.889	0.0104696	1	0.0635491	16.3199
GO:0034116~positive regulation of heterotypic cell-cell adhesion	TNF, IL1B	2	72	2	13528	187.889	0.0104696	1	0.0635491	16.3199
GO:0046136~positive regulation of vitamin metabolic process	TNF, IFNG	2	72	2	13528	187.889	0.0104696	1	0.0635491	16.3199
GO:0048589~developmental growth	AKT1, PTGS2, BCL2, IGF1	4	72	87	13528	8.63857	0.0107205	1	0.0648067	16.6784
GO:0043467~regulation of generation of precursor metabolites and energy	AKT1, IGF1, NOS2	3	72	30	13528	18.7889	0.0107447	1	0.0647268	16.7129
GO:0031175~neuron projection development	EGFR, NRCAM, IGF1R, FGFR1, BCL2, PTEN	6	72	256	13528	4.40365	0.0110212	1	0.0661192	17.1061
GO:0030335~positive regulation of cell migration	EGFR, IGF1R, BCL2, IGF1	4	72	89	13528	8.44444	0.0114011	1	0.0680999	17.6435
GO:0042509~regulation of tyrosine phosphorylation of STAT protein	CSF2, IFNG, IGF1	3	72	31	13528	18.1828	0.0114471	1	0.0681357	17.7083
GO:0043900~regulation of multi-organism process	IFNB1, IFNG, NOS2	3	72	31	13528	18.1828	0.0114471	1	0.0681357	17.7083
GO:0007006~mitochondrial membrane organization	HSP90AA1, BCL2, TP53	3	72	32	13528	17.6146	0.0121691	1	0.0720573	18.7199
GO:0030308~negative regulation of cell growth	BCL2, TP53, ESR2, ENO1	4	72	92	13528	8.16908	0.0124679	1	0.0735236	19.135
GO:0030030~cell projection organization	EGFR, NRCAM, AKT1, IGF1R, FGFR1, BCL2, PTEN	7	72	368	13528	3.57397	0.0126229	1	0.0741608	19.3497
GO:0034976~response to endoplasmic reticulum stress	CCND1, IFNG, TP53	3	72	34	13528	16.5784	0.0136715	1	0.0798439	20.7874
GO:0050806~positive regulation of synaptic transmission	EGFR, TNF, PTGS2	3	72	34	13528	16.5784	0.0136715	1	0.0798439	20.7874
GO:0010827~regulation of glucose transport	AKT1, TNF, IL1B	3	72	34	13528	16.5784	0.0136715	1	0.0798439	20.7874
GO:0048145~regulation of fibroblast proliferation	TP53, IGF1, SOD2	3	72	35	13528	16.1048	0.0144514	1	0.0839561	21.841
GO:0006984~ER-nuclear signaling pathway	CCND1, IFNG, TP53	3	72	35	13528	16.1048	0.0144514	1	0.0839561	21.841
GO:0016044~membrane organization	EGFR, NRCAM, HSP90AA1, KRAS, BCL2, TP53, MAL	7	72	381	13528	3.45203	0.0147661	1	0.0854362	22.2624
GO:0051272~positive regulation of cell motion	EGFR, IGF1R, BCL2, IGF1	4	72	98	13528	7.66893	0.0147684	1	0.08517	22.2655
GO:0040017~positive regulation of locomotion	EGFR, IGF1R, BCL2, IGF1	4	72	98	13528	7.66893	0.0147684	1	0.08517	22.2655
GO:0016337~cell-cell adhesion	EGFR, NRCAM, TNF, CLDN4, BCL2, DSC3	6	72	276	13528	4.08454	0.014862	1	0.0854115	22.3905
GO:0051130~positive regulation of cellular component organization	AKT1, TNF, MAP3K1, IL1B, IGF1	5	72	181	13528	5.1903	0.0150255	1	0.0860363	22.6082
GO:0043269~regulation of ion transport	AKT1, TNF, PTGS2, BCL2	4	72	99	13528	7.59147	0.0151736	1	0.0865723	22.8049
GO:0032675~regulation of interleukin-6 production	TNF, IFNG, IL1B	3	72	36	13528	15.6574	0.0152501	1	0.0867126	22.9064
GO:0001776~leukocyte homeostasis	AKT1, BCL2, IFNG	3	72	36	13528	15.6574	0.0152501	1	0.0867126	22.9064
GO:0010741~negative regulation of protein kinase cascade	AKT1, NCOR1, PTEN	3	72	36	13528	15.6574	0.0152501	1	0.0867126	22.9064
GO:0046425~regulation of JAK-STAT cascade	CSF2, IFNG, IGF1	3	72	36	13528	15.6574	0.0152501	1	0.0867126	22.9064
GO:0048585~negative regulation of response to stimulus	AKT1, IL1B, ESR2, NCOR1	4	72	100	13528	7.51556	0.015585	1	0.0882611	23.3491
GO:0070587~regulation of cell-cell adhesion involved in gastrulation	TNF, IL1B	2	72	3	13528	125.259	0.0156638	1	0.088407	23.4528
GO:0030730~sequestering of triglyceride	TNF, IL1B	2	72	3	13528	125.259	0.0156638	1	0.088407	23.4528
GO:0034114~regulation of heterotypic cell-cell adhesion	TNF, IL1B	2	72	3	13528	125.259	0.0156638	1	0.088407	23.4528
GO:0043902~positive regulation of multi-organism process	IFNG, NOS2	2	72	3	13528	125.259	0.0156638	1	0.088407	23.4528
GO:0051712~positive regulation of killing of cells of another organism	IFNG, NOS2	2	72	3	13528	125.259	0.0156638	1	0.088407	23.4528
GO:0010470~regulation of gastrulation	TNF, IL1B	2	72	3	13528	125.259	0.0156638	1	0.088407	23.4528
GO:0000165~MAPKKK cascade	EGFR, FGFR1, TNF, MAP3K1, IL1B	5	72	184	13528	5.10568	0.0158694	1	0.0892382	23.7231
GO:0002697~regulation of immune effector process	TNF, IFNG, IL1B, NOS2	4	72	101	13528	7.44114	0.0160028	1	0.0896741	23.8979
GO:0051971~positive regulation of transmission of nerve impulse	EGFR, TNF, PTGS2	3	72	37	13528	15.2342	0.0160674	1	0.0897378	23.9824
GO:0009895~negative regulation of catabolic process	AKT1, TNF, IL1B	3	72	37	13528	15.2342	0.0160674	1	0.0897378	23.9824
GO:0030595~leukocyte chemotaxis	CXCL3, IFNG, IL1B	3	72	37	13528	15.2342	0.0160674	1	0.0897378	23.9824
GO:0007178~transmembrane receptor protein serine/threonine kinase signaling pathway	FOS, MAP3K1, JUN, FST	4	72	103	13528	7.29666	0.0168571	1	0.0936754	25.0087
GO:0010675~regulation of cellular carbohydrate metabolic process	AKT1, IFNG, IGF1	3	72	38	13528	14.8333	0.0169031	1	0.0936266	25.0681
GO:0055080~cation homeostasis	BCL2, TGM2, TP53, IL1B, HP, SOD2	6	72	286	13528	3.94172	0.0170833	1	0.0942893	25.3003
GO:0001775~cell activation	EGFR, CSF2, TNF, IFNB1, BCL2, TP53	6	72	287	13528	3.92799	0.0173169	1	0.0952291	25.6003
GO:0007276~gamete generation	PGR, AKT1, RAD51C, AFP, PTGS2, BCL2, FST	7	72	395	13528	3.32968	0.0173459	1	0.0950864	25.6374
GO:0007613~memory	PTGS2, IL1B, PTEN	3	72	39	13528	14.453	0.017757	1	0.0969461	26.1623
GO:0006109~regulation of carbohydrate metabolic process	AKT1, IFNG, IGF1	3	72	39	13528	14.453	0.017757	1	0.0969461	26.1623
GO:0060326~cell chemotaxis	CXCL3, IFNG, IL1B	3	72	39	13528	14.453	0.017757	1	0.0969461	26.1623
GO:0031646~positive regulation of neurological system process	EGFR, TNF, PTGS2	3	72	39	13528	14.453	0.017757	1	0.0969461	26.1623
GO:0051262~protein tetramerization	IGF1R, TP53, SOD2	3	72	39	13528	14.453	0.017757	1	0.0969461	26.1623
GO:0051960~regulation of nervous system development	NRCAM, BCL2, IFNG, TP53, IGF1	5	72	192	13528	4.89294	0.0182643	1	0.0992919	26.8052
GO:0051092~positive regulation of NF-kappaB transcription factor activity	TNF, KRAS, IL1B	3	72	41	13528	13.748	0.0195186	1	0.105478	28.3722
GO:0007565~female pregnancy	FOS, PTGS2, BCL2, IL1B	4	72	110	13528	6.83232	0.020046	1	0.107867	29.0218
GO:0045926~negative regulation of growth	BCL2, TP53, ESR2, ENO1	4	72	110	13528	6.83232	0.020046	1	0.107867	29.0218
GO:0046651~lymphocyte proliferation	IFNB1, BCL2, TP53	3	72	42	13528	13.4206	0.0204258	1	0.109483	29.486
GO:0034613~cellular protein localization	EGFR, AKT1, TNF, JUN, IFNG, AKAP12, TP53	7	72	411	13528	3.20005	0.0206584	1	0.110336	29.7689
GO:0051798~positive regulation of hair follicle development	TNF, FST	2	72	4	13528	93.9444	0.0208311	1	0.110881	29.9782
GO:0051709~regulation of killing of cells of another organism	IFNG, NOS2	2	72	4	13528	93.9444	0.0208311	1	0.110881	29.9782
GO:0002437~inflammatory response to antigenic stimulus	TNF, IL1B	2	72	4	13528	93.9444	0.0208311	1	0.110881	29.9782
GO:0031536~positive regulation of exit from mitosis	BIRC5, UBE2C	2	72	4	13528	93.9444	0.0208311	1	0.110881	29.9782
GO:0030656~regulation of vitamin metabolic process	TNF, IFNG	2	72	4	13528	93.9444	0.0208311	1	0.110881	29.9782
GO:0060556~regulation of vitamin D biosynthetic process	TNF, IFNG	2	72	4	13528	93.9444	0.0208311	1	0.110881	29.9782
GO:0042742~defense response to bacterium	TNF, IFNB1, IFNG, NOS2	4	72	112	13528	6.71032	0.0210141	1	0.111474	30.1995
GO:0070727~cellular macromolecule localization	EGFR, AKT1, TNF, JUN, IFNG, AKAP12, TP53	7	72	414	13528	3.17687	0.0213244	1	0.112703	30.573
GO:0007093~mitotic cell cycle checkpoint	CCND1, TP53, CENPF	3	72	43	13528	13.1085	0.0213505	1	0.112499	30.6043
GO:0051046~regulation of secretion	TNF, FST, IFNG, IL1B, NOS2	5	72	202	13528	4.65072	0.0215599	1	0.113213	30.8553
GO:0008202~steroid metabolic process	CYP3A4, AFP, CYP1B1, CYP1A1, CYP19A1	5	72	202	13528	4.65072	0.0215599	1	0.113213	30.8553
GO:0032943~mononuclear cell proliferation	IFNB1, BCL2, TP53	3	72	44	13528	12.8106	0.0222923	1	0.116522	31.7262
GO:0070661~leukocyte proliferation	IFNB1, BCL2, TP53	3	72	44	13528	12.8106	0.0222923	1	0.116522	31.7262
GO:0065003~macromolecular complex assembly	IGF1R, HSP90AA1, OCLN, MAP3K1, TGM2, TP53, CENPF, SOD2, RAD51	9	72	665	13528	2.54286	0.0227408	1	0.118399	32.2545
GO:0007051~spindle organization	STMN1, UBE2C, NCOR1	3	72	45	13528	12.5259	0.023251	1	0.120564	32.8508
GO:0016567~protein ubiquitination	AKT1, MAP3K1, UBE2C, BRCA1	4	72	119	13528	6.31559	0.0246023	1	0.126819	34.4063
GO:0048514~blood vessel morphogenesis	JUN, TGM2, IL1B, NOS2, PTEN	5	72	211	13528	4.45234	0.0248196	1	0.127508	34.6532
GO:0050731~positive regulation of peptidyl-tyrosine phosphorylation	CSF2, IFNG, IGF1	3	72	47	13528	11.9929	0.0252187	1	0.129072	35.1044
GO:0070201~regulation of establishment of protein localization	AKT1, TNF, IFNG, IL1B	4	72	121	13528	6.2112	0.0256847	1	0.130945	35.6276
GO:0034391~regulation of smooth muscle cell apoptosis	IFNG, IGF1	2	72	5	13528	75.1556	0.0259717	1	0.131947	35.9478
GO:0002360~T cell lineage commitment	BCL2, TP53	2	72	5	13528	75.1556	0.0259717	1	0.131947	35.9478
GO:0002326~B cell lineage commitment	BCL2, TP53	2	72	5	13528	75.1556	0.0259717	1	0.131947	35.9478
GO:0009404~toxin metabolic process	CYP1B1, CYP1A1	2	72	5	13528	75.1556	0.0259717	1	0.131947	35.9478
GO:0042108~positive regulation of cytokine biosynthetic process	TNF, IFNG, IL1B	3	72	48	13528	11.7431	0.0262272	1	0.132792	36.2317
GO:0000077~DNA damage checkpoint	CCND1, TP53, BRCA1	3	72	48	13528	11.7431	0.0262272	1	0.132792	36.2317
GO:0006955~immune response	IGF1R, CSF2, TNF, CXCL3, BCL2, IFNG, TP53, IL1B, NOS2	9	72	690	13528	2.45072	0.0275916	1	0.138893	37.7275
GO:0006954~inflammatory response	AKT1, FOS, TNF, CXCL3, IL1B, STAT3	6	72	325	13528	3.46872	0.0278299	1	0.139625	37.9852
GO:0016202~regulation of striated muscle tissue development	TBX3, BCL2, CENPF	3	72	50	13528	11.2733	0.0282926	1	0.141407	38.483
GO:0009968~negative regulation of signal transduction	AKT1, CCND1, IL1B, NCOR1, PTEN	5	72	221	13528	4.25088	0.0287746	1	0.143266	38.9976
GO:0048634~regulation of muscle development	TBX3, BCL2, CENPF	3	72	51	13528	11.0523	0.0293491	1	0.14554	39.6055
GO:0043524~negative regulation of neuron apoptosis	KRAS, BCL2, SOD2	3	72	51	13528	11.0523	0.0293491	1	0.14554	39.6055
GO:0031570~DNA integrity checkpoint	CCND1, TP53, BRCA1	3	72	52	13528	10.8397	0.0304211	1	0.150096	40.7249
GO:0044092~negative regulation of molecular function	AKT1, PIM1, TP53, IL1B, BIRC5, UBE2C	6	72	334	13528	3.37525	0.0308073	1	0.151458	41.1232
GO:0045410~positive regulation of interleukin-6 biosynthetic process	IFNG, IL1B	2	72	6	13528	62.6296	0.0310856	1	0.152316	41.4088
GO:0060395~SMAD protein signal transduction	FOS, JUN	2	72	6	13528	62.6296	0.0310856	1	0.152316	41.4088
GO:0014911~positive regulation of smooth muscle cell migration	BCL2, IGF1	2	72	6	13528	62.6296	0.0310856	1	0.152316	41.4088
GO:0045922~negative regulation of fatty acid metabolic process	AKT1, BRCA1	2	72	6	13528	62.6296	0.0310856	1	0.152316	41.4088
GO:0042634~regulation of hair cycle	TNF, FST	2	72	6	13528	62.6296	0.0310856	1	0.152316	41.4088
GO:0051797~regulation of hair follicle development	TNF, FST	2	72	6	13528	62.6296	0.0310856	1	0.152316	41.4088
GO:0002544~chronic inflammatory response	TNF, IL1B	2	72	6	13528	62.6296	0.0310856	1	0.152316	41.4088
GO:0002521~leukocyte differentiation	CSF2, TNF, BCL2, TP53	4	72	131	13528	5.73707	0.0314761	1	0.153681	41.8073
GO:0032446~protein modification by small protein conjugation	AKT1, MAP3K1, UBE2C, BRCA1	4	72	132	13528	5.6936	0.03209	1	0.15605	42.4285
GO:0007423~sensory organ development	EGFR, CYP1A1, MAP3K1, BCL2, STAT3	5	72	229	13528	4.10238	0.0321948	1	0.1561	42.5339
GO:0045597~positive regulation of cell differentiation	NRCAM, AKT1, CSF2, JUN, BCL2	5	72	229	13528	4.10238	0.0321948	1	0.1561	42.5339
GO:0006919~activation of caspase activity	TNF, IFNB1, TP53	3	72	54	13528	10.4383	0.0326114	1	0.157556	42.9513
GO:0032870~cellular response to hormone stimulus	AKT1, IGF1R, FOS, STAT3	4	72	133	13528	5.65079	0.0327101	1	0.157574	43.0497
GO:0042391~regulation of membrane potential	JUN, BCL2, MAL, SOD2	4	72	134	13528	5.60862	0.0333365	1	0.159952	43.6709
GO:0051048~negative regulation of secretion	TNF, FST, IL1B	3	72	55	13528	10.2485	0.0337292	1	0.161273	44.057
GO:0050804~regulation of synaptic transmission	EGFR, TNF, KRAS, PTGS2	4	72	136	13528	5.52614	0.034608	1	0.164736	44.9121
GO:0009612~response to mechanical stimulus	FOS, TNF, JUN	3	72	56	13528	10.0655	0.0348619	1	0.165418	45.1568
GO:0042542~response to hydrogen peroxide	JUN, BCL2, SOD2	3	72	56	13528	10.0655	0.0348619	1	0.165418	45.1568
GO:0009408~response to heat	AKT1, BCL2, IL1B	3	72	56	13528	10.0655	0.0348619	1	0.165418	45.1568
GO:0048584~positive regulation of response to stimulus	TNF, IFNB1, TGM2, IL1B, BRCA1	5	72	236	13528	3.9807	0.035376	1	0.167238	45.6493
GO:0030097~hemopoiesis	CSF2, TNF, BCL2, TP53, SOD2	5	72	236	13528	3.9807	0.035376	1	0.167238	45.6493
GO:0050665~hydrogen peroxide biosynthetic process	CYP1A1, SOD2	2	72	7	13528	53.6825	0.0361731	1	0.17028	46.4046
GO:0033143~regulation of steroid hormone receptor signaling pathway	NCOA3, IGF1	2	72	7	13528	53.6825	0.0361731	1	0.17028	46.4046
GO:0010893~positive regulation of steroid biosynthetic process	TNF, IFNG	2	72	7	13528	53.6825	0.0361731	1	0.17028	46.4046
GO:0046782~regulation of viral transcription	IFNB1, MAP3K1	2	72	7	13528	53.6825	0.0361731	1	0.17028	46.4046
GO:0051968~positive regulation of synaptic transmission, glutamatergic	EGFR, PTGS2	2	72	7	13528	53.6825	0.0361731	1	0.17028	46.4046
GO:0017085~response to insecticide	TYMS, CYP1A1	2	72	7	13528	53.6825	0.0361731	1	0.17028	46.4046
GO:0048525~negative regulation of viral reproduction	TNF, IFNB1	2	72	7	13528	53.6825	0.0361731	1	0.17028	46.4046
GO:0055066~di-, tri-valent inorganic cation homeostasis	BCL2, TGM2, IL1B, HP, SOD2	5	72	239	13528	3.93073	0.0367936	1	0.17253	46.9857
GO:0034754~cellular hormone metabolic process	AFP, CYP1B1, CYP1A1	3	72	59	13528	9.55367	0.0383474	1	0.178785	48.4149
GO:0043280~positive regulation of caspase activity	TNF, IFNB1, TP53	3	72	59	13528	9.55367	0.0383474	1	0.178785	48.4149
GO:0010952~positive regulation of peptidase activity	TNF, IFNB1, TP53	3	72	59	13528	9.55367	0.0383474	1	0.178785	48.4149
GO:0051129~negative regulation of cellular component organization	MAP3K1, CENPF, PTEN, BRCA1	4	72	142	13528	5.29264	0.0385722	1	0.179286	48.6187
GO:0007179~transforming growth factor beta receptor signaling pathway	FOS, MAP3K1, JUN	3	72	60	13528	9.39444	0.0395377	1	0.182945	49.4853
GO:0007612~learning	FOS, KRAS, JUN	3	72	60	13528	9.39444	0.0395377	1	0.182945	49.4853
GO:0045785~positive regulation of cell adhesion	TNF, TGM2, IL1B	3	72	60	13528	9.39444	0.0395377	1	0.182945	49.4853
GO:0016049~cell growth	FGFR2, FGFR1, BCL2	3	72	61	13528	9.24044	0.040742	1	0.187581	50.5469
GO:0042359~vitamin D metabolic process	CYP3A4, CYP1A1	2	72	8	13528	46.9722	0.0412342	1	0.189177	50.9747
GO:0010660~regulation of muscle cell apoptosis	IFNG, IGF1	2	72	8	13528	46.9722	0.0412342	1	0.189177	50.9747
GO:0055093~response to hyperoxia	CYP1A1, SOD2	2	72	8	13528	46.9722	0.0412342	1	0.189177	50.9747
GO:0048147~negative regulation of fibroblast proliferation	TP53, SOD2	2	72	8	13528	46.9722	0.0412342	1	0.189177	50.9747
GO:0060341~regulation of cellular localization	TNF, FST, IFNG, IL1B, NOS2	5	72	248	13528	3.78808	0.041242	1	0.188728	50.9814
GO:0022602~ovulation cycle process	PGR, AFP, BCL2	3	72	62	13528	9.0914	0.0419601	1	0.191254	51.5993
GO:0000226~microtubule cytoskeleton organization	STMN1, UBE2C, NCOR1, BRCA1	4	72	147	13528	5.11262	0.0420456	1	0.191127	51.6723
GO:0030003~cellular cation homeostasis	BCL2, TGM2, TP53, IL1B, HP	5	72	254	13528	3.6986	0.044371	1	0.200274	53.6204
GO:0031668~cellular response to extracellular stimulus	FOS, JUN, TP53	3	72	64	13528	8.80729	0.0444371	1	0.200044	53.6746
GO:0010817~regulation of hormone levels	AFP, CYP1B1, CYP1A1, TBX3	4	72	151	13528	4.97719	0.0449344	1	0.201583	54.081
GO:0048754~branching morphogenesis of a tube	TBX3, BCL2, IGF1	3	72	65	13528	8.67179	0.0456956	1	0.204187	54.6967
GO:0046546~development of primary male sexual characteristics	CCND1, TBX3, BCL2	3	72	65	13528	8.67179	0.0456956	1	0.204187	54.6967
GO:0045684~positive regulation of epidermis development	TNF, FST	2	72	9	13528	41.7531	0.0462692	1	0.20601	55.1554
GO:0051000~positive regulation of nitric-oxide synthase activity	AKT1, KRAS	2	72	9	13528	41.7531	0.0462692	1	0.20601	55.1554
GO:0032094~response to food	AKT1, CYP1A1	2	72	9	13528	41.7531	0.0462692	1	0.20601	55.1554
GO:0043491~protein kinase B signaling cascade	AKT1, RPS6KB2	2	72	9	13528	41.7531	0.0462692	1	0.20601	55.1554
GO:0048009~insulin-like growth factor receptor signaling pathway	AKT1, IGF1R	2	72	9	13528	41.7531	0.0462692	1	0.20601	55.1554
GO:0042640~anagen	AKT1, PTGS2	2	72	9	13528	41.7531	0.0462692	1	0.20601	55.1554
GO:0006006~glucose metabolic process	AKT1, ALDOA, TNF, ENO1	4	72	153	13528	4.91213	0.0464151	1	0.206092	55.2714
GO:0006886~intracellular protein transport	AKT1, TNF, JUN, IFNG, AKAP12, TP53	6	72	374	13528	3.01426	0.0464314	1	0.205652	55.2844
GO:0043434~response to peptide hormone stimulus	AKT1, IGF1R, BCL2, STAT3	4	72	154	13528	4.88023	0.0471645	1	0.208094	55.8628
GO:0048534~hemopoietic or lymphoid organ development	CSF2, TNF, BCL2, TP53, SOD2	5	72	260	13528	3.61325	0.0476307	1	0.209452	56.227
GO:0051222~positive regulation of protein transport	TNF, IFNG, IL1B	3	72	67	13528	8.41294	0.0482517	1	0.211417	56.7077
GO:0055114~oxidation reduction	CYP3A4, CYP1B1, PTGS2, CYP1A1, FASN, NOS2, CYP19A1, SOD2	8	72	639	13528	2.35229	0.0497314	1	0.216764	57.833
GO:0006839~mitochondrial transport	HSP90AA1, BCL2, TP53	3	72	69	13528	8.16908	0.050859	1	0.220675	58.6721
GO:0033138~positive regulation of peptidyl-serine phosphorylation	BCL2, IFNG	2	72	10	13528	37.5778	0.051278	1	0.221785	58.9799
GO:0046329~negative regulation of JNK cascade	AKT1, NCOR1	2	72	10	13528	37.5778	0.051278	1	0.221785	58.9799
GO:0070303~negative regulation of stress-activated protein kinase signaling pathway	AKT1, NCOR1	2	72	10	13528	37.5778	0.051278	1	0.221785	58.9799
GO:0046685~response to arsenic	CYP1A1, PTEN	2	72	10	13528	37.5778	0.051278	1	0.221785	58.9799
GO:0042523~positive regulation of tyrosine phosphorylation of Stat5 protein	CSF2, IGF1	2	72	10	13528	37.5778	0.051278	1	0.221785	58.9799
GO:0032891~negative regulation of organic acid transport	AKT1, TNF	2	72	10	13528	37.5778	0.051278	1	0.221785	58.9799
GO:0010829~negative regulation of glucose transport	TNF, IL1B	2	72	10	13528	37.5778	0.051278	1	0.221785	58.9799
GO:0070647~protein modification by small protein conjugation or removal	AKT1, MAP3K1, UBE2C, BRCA1	4	72	160	13528	4.69722	0.0517863	1	0.223236	59.3503
GO:0007015~actin filament organization	ALDOA, BCL2, EVL	3	72	72	13528	7.8287	0.0548628	1	0.234582	61.5263
GO:0046907~intracellular transport	AKT1, HSP90AA1, TNF, JUN, BCL2, IFNG, AKAP12, TP53	8	72	657	13528	2.28784	0.056178	1	0.239054	62.4226
GO:0046661~male sex differentiation	CCND1, TBX3, BCL2	3	72	73	13528	7.72146	0.0562216	1	0.23866	62.452
GO:0022409~positive regulation of cell-cell adhesion	TNF, IL1B	2	72	11	13528	34.1616	0.056261	1	0.238253	62.4785
GO:0051881~regulation of mitochondrial membrane potential	BCL2, SOD2	2	72	11	13528	34.1616	0.056261	1	0.238253	62.4785
GO:0031571~G1 DNA damage checkpoint	CCND1, TP53	2	72	11	13528	34.1616	0.056261	1	0.238253	62.4785
GO:0046902~regulation of mitochondrial membrane permeability	BCL2, TP53	2	72	11	13528	34.1616	0.056261	1	0.238253	62.4785
GO:0030520~estrogen receptor signaling pathway	ESR1, ESR2	2	72	11	13528	34.1616	0.056261	1	0.238253	62.4785
GO:0002520~immune system development	CSF2, TNF, BCL2, TP53, SOD2	5	72	276	13528	3.40378	0.0569602	1	0.240342	62.9464
GO:0043086~negative regulation of catalytic activity	AKT1, TP53, IL1B, BIRC5, UBE2C	5	72	277	13528	3.3915	0.0575739	1	0.242095	63.3525
GO:0042035~regulation of cytokine biosynthetic process	TNF, IFNG, IL1B	3	72	74	13528	7.61712	0.0575921	1	0.241605	63.3644
GO:0001763~morphogenesis of a branching structure	TBX3, BCL2, IGF1	3	72	74	13528	7.61712	0.0575921	1	0.241605	63.3644
GO:0042113~B cell activation	IFNB1, BCL2, TP53	3	72	76	13528	7.41667	0.0603681	1	0.251387	65.149
GO:0001542~ovulation from ovarian follicle	PGR, AFP	2	72	12	13528	31.3148	0.0612181	1	0.253952	65.6789
GO:0045931~positive regulation of mitotic cell cycle	CYP1A1, BIRC5	2	72	12	13528	31.3148	0.0612181	1	0.253952	65.6789
GO:0031577~spindle checkpoint	CENPF, BIRC5	2	72	12	13528	31.3148	0.0612181	1	0.253952	65.6789
GO:0051926~negative regulation of calcium ion transport	PTGS2, BCL2	2	72	12	13528	31.3148	0.0612181	1	0.253952	65.6789
GO:0006809~nitric oxide biosynthetic process	AKT1, NOS2	2	72	12	13528	31.3148	0.0612181	1	0.253952	65.6789
GO:0014910~regulation of smooth muscle cell migration	BCL2, IGF1	2	72	12	13528	31.3148	0.0612181	1	0.253952	65.6789
GO:0007096~regulation of exit from mitosis	BIRC5, UBE2C	2	72	12	13528	31.3148	0.0612181	1	0.253952	65.6789
GO:0019748~secondary metabolic process	CYP1B1, CYP1A1, BCL2	3	72	79	13528	7.13502	0.0646166	1	0.265795	67.7226
GO:0006633~fatty acid biosynthetic process	PTGS2, FASN, BRCA1	3	72	79	13528	7.13502	0.0646166	1	0.265795	67.7226
GO:0042770~DNA damage response, signal transduction	CCND1, TP53, BRCA1	3	72	80	13528	7.04583	0.0660548	1	0.270395	68.5525
GO:0042100~B cell proliferation	IFNB1, BCL2	2	72	13	13528	28.906	0.0661496	1	0.270132	68.6065
GO:0046209~nitric oxide metabolic process	AKT1, NOS2	2	72	13	13528	28.906	0.0661496	1	0.270132	68.6065
GO:0045995~regulation of embryonic development	TNF, IL1B	2	72	13	13528	28.906	0.0661496	1	0.270132	68.6065
GO:0048820~hair follicle maturation	AKT1, PTGS2	2	72	13	13528	28.906	0.0661496	1	0.270132	68.6065
GO:0033198~response to ATP	IL1B, PTEN	2	72	13	13528	28.906	0.0661496	1	0.270132	68.6065
GO:0042522~regulation of tyrosine phosphorylation of Stat5 protein	CSF2, IGF1	2	72	13	13528	28.906	0.0661496	1	0.270132	68.6065
GO:0010959~regulation of metal ion transport	AKT1, PTGS2, BCL2	3	72	81	13528	6.95885	0.0675037	1	0.274378	69.3683
GO:0010639~negative regulation of organelle organization	MAP3K1, CENPF, BRCA1	3	72	82	13528	6.87398	0.0689631	1	0.278958	70.1698
GO:0000187~activation of MAPK activity	TNF, MAP3K1, IL1B	3	72	82	13528	6.87398	0.0689631	1	0.278958	70.1698
GO:0045940~positive regulation of steroid metabolic process	TNF, IFNG	2	72	14	13528	26.8413	0.0710555	1	0.285717	71.2846
GO:0009651~response to salt stress	TNF, TP53	2	72	14	13528	26.8413	0.0710555	1	0.285717	71.2846
GO:0033135~regulation of peptidyl-serine phosphorylation	BCL2, IFNG	2	72	14	13528	26.8413	0.0710555	1	0.285717	71.2846
GO:0043526~neuroprotection	ESR1, ESR2	2	72	14	13528	26.8413	0.0710555	1	0.285717	71.2846
GO:0045408~regulation of interleukin-6 biosynthetic process	IFNG, IL1B	2	72	14	13528	26.8413	0.0710555	1	0.285717	71.2846
GO:0008544~epidermis development	AKT1, PTGS2, BCL2, FST	4	72	184	13528	4.08454	0.0723514	1	0.289623	71.9553
GO:0048871~multicellular organismal homeostasis	BCL2, IL1B, STAT3	3	72	85	13528	6.63137	0.0734035	1	0.292648	72.4889
GO:0051303~establishment of chromosome localization	CENPF, BIRC5	2	72	15	13528	25.0519	0.075936	1	0.300738	73.7344
GO:0001662~behavioral fear response	BCL2, ESR2	2	72	15	13528	25.0519	0.075936	1	0.300738	73.7344
GO:0050931~pigment cell differentiation	BCL2, SOD2	2	72	15	13528	25.0519	0.075936	1	0.300738	73.7344
GO:0050000~chromosome localization	CENPF, BIRC5	2	72	15	13528	25.0519	0.075936	1	0.300738	73.7344
GO:0002209~behavioral defense response	BCL2, ESR2	2	72	15	13528	25.0519	0.075936	1	0.300738	73.7344
GO:0010165~response to X-ray	CCND1, TP53	2	72	15	13528	25.0519	0.075936	1	0.300738	73.7344
GO:0051668~localization within membrane	EGFR, MAL	2	72	15	13528	25.0519	0.075936	1	0.300738	73.7344
GO:0042060~wound healing	MAP3K1, IL1B, IGF1, TFPI2	4	72	191	13528	3.93485	0.0789469	1	0.310337	75.1462
GO:0019318~hexose metabolic process	AKT1, ALDOA, TNF, ENO1	4	72	192	13528	3.91435	0.0799101	1	0.312926	75.5825
GO:0022612~gland morphogenesis	EGFR, BCL2	2	72	16	13528	23.4861	0.0807912	1	0.315219	75.9754
GO:0017144~drug metabolic process	CYP3A4, CYP1A1	2	72	16	13528	23.4861	0.0807912	1	0.315219	75.9754
GO:0046579~positive regulation of Ras protein signal transduction	KRAS, IGF1	2	72	16	13528	23.4861	0.0807912	1	0.315219	75.9754
GO:0045598~regulation of fat cell differentiation	AKT1, SOD2	2	72	16	13528	23.4861	0.0807912	1	0.315219	75.9754
GO:0033280~response to vitamin D	PTGS2, IL1B	2	72	16	13528	23.4861	0.0807912	1	0.315219	75.9754
GO:0001819~positive regulation of cytokine production	TNF, IFNG, IL1B	3	72	90	13528	6.26296	0.0810024	1	0.315262	76.0687
GO:0043409~negative regulation of MAPKKK cascade	AKT1, NCOR1	2	72	17	13528	22.1046	0.0856212	1	0.329871	78.0253
GO:0051057~positive regulation of small GTPase mediated signal transduction	KRAS, IGF1	2	72	17	13528	22.1046	0.0856212	1	0.329871	78.0253
GO:0032890~regulation of organic acid transport	AKT1, TNF	2	72	17	13528	22.1046	0.0856212	1	0.329871	78.0253
GO:0031575~G1/S transition checkpoint	CCND1, TP53	2	72	17	13528	22.1046	0.0856212	1	0.329871	78.0253
GO:0046330~positive regulation of JNK cascade	TNF, IL1B	2	72	17	13528	22.1046	0.0856212	1	0.329871	78.0253
GO:0007398~ectoderm development	AKT1, PTGS2, BCL2, FST	4	72	199	13528	3.77666	0.0867961	1	0.333024	78.4984
GO:0010551~regulation of specific transcription from RNA polymerase II promoter	MAP3K1, TP53, NCOR1	3	72	94	13528	5.99645	0.0872498	1	0.333813	78.6785
GO:0051260~protein homooligomerization	TGM2, SOD2, RAD51	3	72	95	13528	5.93333	0.0888339	1	0.338248	79.2963
GO:0008610~lipid biosynthetic process	PTGS2, CYP1A1, FASN, BRCA1, CYP19A1	5	72	323	13528	2.9085	0.0895938	1	0.34	79.5867
GO:0008104~protein localization	EGFR, AKT1, TNF, JUN, IFNG, AKAP12, TP53, CENPF, MAL	9	72	882	13528	1.91723	0.089953	1	0.340459	79.7226
GO:0019915~lipid storage	TNF, IL1B	2	72	18	13528	20.8765	0.0904263	1	0.34128	79.9004
GO:0043123~positive regulation of I-kappaB kinase/NF-kappaB cascade	TNF, TGM2, IL1B	3	72	97	13528	5.811	0.0920278	1	0.345677	80.4912
GO:0060284~regulation of cell development	NRCAM, TBX3, BCL2, TP53	4	72	205	13528	3.66612	0.0928934	1	0.347715	80.8037
GO:0000724~double-strand break repair via homologous recombination	BRCA1, RAD51	2	72	19	13528	19.7778	0.0952064	1	0.354267	81.6157
GO:0010907~positive regulation of glucose metabolic process	AKT1, IGF1	2	72	19	13528	19.7778	0.0952064	1	0.354267	81.6157
GO:0032755~positive regulation of interleukin-6 production	TNF, IL1B	2	72	19	13528	19.7778	0.0952064	1	0.354267	81.6157
GO:0042596~fear response	BCL2, ESR2	2	72	19	13528	19.7778	0.0952064	1	0.354267	81.6157
GO:0051966~regulation of synaptic transmission, glutamatergic	EGFR, PTGS2	2	72	19	13528	19.7778	0.0952064	1	0.354267	81.6157
GO:0000725~recombinational repair	BRCA1, RAD51	2	72	19	13528	19.7778	0.0952064	1	0.354267	81.6157
GO:0031069~hair follicle morphogenesis	BCL2, FST	2	72	19	13528	19.7778	0.0952064	1	0.354267	81.6157
GO:0008217~regulation of blood pressure	PTGS2, NOS2, SOD2	3	72	100	13528	5.63667	0.0968811	1	0.358765	82.1833
GO:0048872~homeostasis of number of cells	AKT1, BCL2, IFNG	3	72	100	13528	5.63667	0.0968811	1	0.358765	82.1833
GO:0010608~posttranscriptional regulation of gene expression	AKT1, TNF, BCL2, PTEN	4	72	211	13528	3.56187	0.0991647	1	0.365089	82.9308
GO:0006805~xenobiotic metabolic process	CYP3A4, CYP1A1	2	72	20	13528	18.7889	0.0999618	1	0.366811	83.1847
GO:0048678~response to axon injury	BCL2, SOD2	2	72	20	13528	18.7889	0.0999618	1	0.366811	83.1847
Supplemental Table S1B
Term	Genes	Count	List Total	Pop Hits	Pop Total	Fold Enrichment	PValue	Bonferroni	Benjamini	FDR
GO:0043066~negative regulation of apoptosis	EGFR, IL6, TNF, TP53, ESR1, NFKBIA, BIRC5, HSPA1B, SOD2, EDNRB, KRT18, HMOX1, BCL2, CFL1, IL1B, NOS3	16	43	354	13528	14.2194	7.15453e-14	1.09893e-10	1.09893e-10	1.19149e-10
GO:0043069~negative regulation of programmed cell death	EGFR, IL6, TNF, TP53, ESR1, NFKBIA, BIRC5, HSPA1B, SOD2, EDNRB, KRT18, HMOX1, BCL2, CFL1, IL1B, NOS3	16	43	359	13528	14.0214	8.78406e-14	1.34977e-10	6.74886e-11	1.46338e-10
GO:0060548~negative regulation of cell death	EGFR, IL6, TNF, TP53, ESR1, NFKBIA, BIRC5, HSPA1B, SOD2, EDNRB, KRT18, HMOX1, BCL2, CFL1, IL1B, NOS3	16	43	360	13528	13.9824	9.14222e-14	1.40438e-10	4.68126e-11	1.52267e-10
GO:0042981~regulation of apoptosis	EGFR, IL6, TNF, PTGS2, TP53, ESR1, NFKBIA, BIRC5, HSPA1B, SOD2, EDNRB, KRT18, CDKN1B, HMOX1, BCL2, CFL1, IL1B, NOS3, NQO1, TOP2A	20	43	804	13528	7.82599	5.03727e-13	7.74199e-10	1.9355e-10	8.39395e-10
GO:0043067~regulation of programmed cell death	EGFR, IL6, TNF, PTGS2, TP53, ESR1, NFKBIA, BIRC5, HSPA1B, SOD2, EDNRB, KRT18, CDKN1B, HMOX1, BCL2, CFL1, IL1B, NOS3, NQO1, TOP2A	20	43	812	13528	7.74888	6.01025e-13	9.23852e-10	1.8477e-10	1.00165e-09
GO:0010941~regulation of cell death	EGFR, IL6, TNF, PTGS2, TP53, ESR1, NFKBIA, BIRC5, HSPA1B, SOD2, EDNRB, KRT18, CDKN1B, HMOX1, BCL2, CFL1, IL1B, NOS3, NQO1, TOP2A	20	43	815	13528	7.72036	6.41872e-13	9.86477e-10	1.64413e-10	1.06956e-09
GO:0006916~anti-apoptosis	TNF, HMOX1, BCL2, CFL1, ESR1, NFKBIA, IL1B, NOS3, BIRC5, HSPA1B, SOD2	11	43	206	13528	16.7993	5.18672e-10	7.97199e-07	1.13886e-07	8.64333e-07
GO:0042127~regulation of cell proliferation	EGFR, IL6, TNF, ADAM10, PTGS2, TP53, NFKBIA, CD40, SOD2, EDNRB, CCND1, CDKN1B, HMOX1, BCL2, IL1B, NOS3, GPNMB	17	43	787	13528	6.79578	5.91963e-10	9.09847e-07	1.13731e-07	9.86467e-07
GO:0010033~response to organic substance	EGFR, IL6, TNF, ADAM10, PTGS2, CYP1A1, ESR1, NFKBIA, HSPA1B, CCND1, HMOX1, BCL2, CFL1, IL1B, NOS3	15	43	721	13528	6.54517	1.7275e-08	2.65513e-05	2.95018e-06	2.87876e-05
GO:0051726~regulation of cell cycle	E2F1, EGFR, CCND1, CDKN1B, TNF, PTGS2, CYP1A1, BCL2, TP53, IL1B, BIRC5	11	43	331	13528	10.4551	4.92952e-08	7.57638e-05	7.57664e-06	8.21471e-05
GO:0048545~response to steroid hormone stimulus	CCND1, IL6, TNF, PTGS2, HMOX1, BCL2, ESR1, IL1B, NOS3	9	43	192	13528	14.7471	1.11124e-07	0.000170783	1.5527e-05	0.000185181
GO:0008285~negative regulation of cell proliferation	IL6, CDKN1B, TNF, PTGS2, HMOX1, BCL2, TP53, IL1B, NOS3, GPNMB, SOD2	11	43	361	13528	9.58629	1.11189e-07	0.000170883	1.42414e-05	0.000185289
GO:0009617~response to bacterium	GPX2, IL6, TNF, PTGS2, CYP1A1, CCL20, NFKBIA, IL1B, NOS3	9	43	193	13528	14.6707	1.15669e-07	0.000177767	1.36755e-05	0.000192754
GO:0008219~cell death	E2F1, IL6, TNF, TP53, NFKBIA, BIRC5, SOD2, CDKN1B, KRT18, BCL2, HMOX1, KRT8, IL1B, TOP2A	14	43	719	13528	6.12582	1.47586e-07	0.000226815	1.62027e-05	0.000245943
GO:0016265~death	E2F1, IL6, TNF, TP53, NFKBIA, BIRC5, SOD2, CDKN1B, KRT18, BCL2, HMOX1, KRT8, IL1B, TOP2A	14	43	724	13528	6.08352	1.59951e-07	0.000245814	1.63895e-05	0.000266547
GO:0012501~programmed cell death	E2F1, IL6, TNF, TP53, NFKBIA, BIRC5, SOD2, CDKN1B, KRT18, BCL2, KRT8, IL1B, TOP2A	13	43	611	13528	6.69372	2.05914e-07	0.000316439	1.97804e-05	0.000343141
GO:0042493~response to drug	CCND1, PTGS2, CYP1A1, BCL2, TP53, IL1B, NOS3, DNMT3B, SOD2	9	43	216	13528	13.1085	2.7463e-07	0.000422017	2.48295e-05	0.000457652
GO:0007346~regulation of mitotic cell cycle	EGFR, CCND1, TNF, CYP1A1, BCL2, TP53, IL1B, BIRC5	8	43	152	13528	16.5581	3.81938e-07	0.000586867	3.26127e-05	0.000636473
GO:0042327~positive regulation of phosphorylation	EGFR, EDNRB, CCND1, IL6, TNF, BCL2, IL1B	7	43	97	13528	22.7034	4.95109e-07	0.000760693	4.00509e-05	0.000825063
GO:0010562~positive regulation of phosphorus metabolic process	EGFR, EDNRB, CCND1, IL6, TNF, BCL2, IL1B	7	43	100	13528	22.0223	5.93174e-07	0.000911294	4.55844e-05	0.000988481
GO:0045937~positive regulation of phosphate metabolic process	EGFR, EDNRB, CCND1, IL6, TNF, BCL2, IL1B	7	43	100	13528	22.0223	5.93174e-07	0.000911294	4.55844e-05	0.000988481
GO:0051240~positive regulation of multicellular organismal process	EGFR, IL6, TNF, PTGS2, HMOX1, BCL2, IL1B, NOS3, CD40	9	43	244	13528	11.6043	6.94071e-07	0.00106622	5.07981e-05	0.00115662
GO:0043627~response to estrogen stimulus	CCND1, PTGS2, HMOX1, BCL2, ESR1, IL1B, NOS3	7	43	105	13528	20.9736	7.91713e-07	0.00121612	5.53104e-05	0.00131933
GO:0045787~positive regulation of cell cycle	EGFR, CCND1, TNF, CYP1A1, IL1B, BIRC5	6	43	57	13528	33.1163	8.3842e-07	0.00128782	5.60268e-05	0.00139716
GO:0010604~positive regulation of macromolecule metabolic process	E2F1, IL6, TNF, TP53, ESR1, NFKBIA, CD40, EDNRB, CCND1, BCL2, HMOX1, IL1B, AREG, DNMT3B	14	43	857	13528	5.1394	1.10385e-06	0.00169518	7.06901e-05	0.00183948
GO:0006915~apoptosis	E2F1, IL6, KRT18, TNF, BCL2, KRT8, TP53, NFKBIA, IL1B, BIRC5, TOP2A, SOD2	12	43	602	13528	6.27119	1.50203e-06	0.00230596	9.23405e-05	0.002503
GO:0014070~response to organic cyclic substance	CCND1, PTGS2, CYP1A1, HMOX1, BCL2, IL1B, NOS3	7	43	121	13528	18.2003	1.82274e-06	0.00279763	0.000107746	0.00303743
GO:0031667~response to nutrient levels	CCND1, PTGS2, CYP1A1, HMOX1, BCL2, TP53, IL1B, SOD2	8	43	197	13528	12.7758	2.18721e-06	0.0033561	0.000124501	0.00364477
GO:0010035~response to inorganic substance	EGFR, CCND1, PTGS2, CYP1A1, HMOX1, BCL2, NOS3, SOD2	8	43	205	13528	12.2773	2.8499e-06	0.00437072	0.000156427	0.00474906
GO:0009719~response to endogenous stimulus	CCND1, IL6, TNF, PTGS2, HMOX1, BCL2, CFL1, ESR1, IL1B, NOS3	10	43	405	13528	7.76802	3.2807e-06	0.00502976	0.000173862	0.00546693
GO:0045073~regulation of chemokine biosynthetic process	IL6, TNF, HMOX1, IL1B	4	43	10	13528	125.842	3.2892e-06	0.00504275	0.000168503	0.00548109
GO:0051051~negative regulation of transport	TNF, PTGS2, HMOX1, BCL2, NFKBIA, IL1B, NOS3	7	43	135	13528	16.3128	3.45022e-06	0.00528897	0.00017105	0.00574941
GO:0009611~response to wounding	IL6, TNF, CYP1A1, CCL20, HMOX1, CXCL3, BCL2, CXCL2, IL1B, CD40, SOD2	11	43	530	13528	6.52953	3.71347e-06	0.00569135	0.000178347	0.00618806
GO:0008284~positive regulation of cell proliferation	EGFR, CCND1, IL6, CDKN1B, ADAM10, TNF, PTGS2, BCL2, IL1B, CD40	10	43	414	13528	7.59915	3.92627e-06	0.00601651	0.000182853	0.00654266
GO:0051384~response to glucocorticoid stimulus	CCND1, IL6, TNF, PTGS2, BCL2, IL1B	6	43	78	13528	24.2004	4.02944e-06	0.00617412	0.000182138	0.00671457
GO:0009991~response to extracellular stimulus	CCND1, PTGS2, CYP1A1, HMOX1, BCL2, TP53, IL1B, SOD2	8	43	220	13528	11.4402	4.54728e-06	0.00696482	0.000199671	0.00757747
GO:0031960~response to corticosteroid stimulus	CCND1, IL6, TNF, PTGS2, BCL2, IL1B	6	43	85	13528	22.2074	6.16155e-06	0.00942563	0.00026303	0.0102673
GO:0002237~response to molecule of bacterial origin	IL6, PTGS2, CYP1A1, NFKBIA, IL1B, NOS3	6	43	86	13528	21.9492	6.52698e-06	0.00998185	0.000271098	0.0108762
GO:0032270~positive regulation of cellular protein metabolic process	EDNRB, CCND1, IL6, TNF, BCL2, NFKBIA, IL1B, DNMT3B	8	43	233	13528	10.8019	6.63381e-06	0.0101444	0.000268285	0.0110542
GO:0044092~negative regulation of molecular function	EDNRB, CDKN1B, HMOX1, TP53, NFKBIA, IL1B, NOS3, BIRC5, NQO1	9	43	334	13528	8.47737	7.20369e-06	0.011011	0.00028386	0.0120038
GO:0001934~positive regulation of protein amino acid phosphorylation	EDNRB, CCND1, IL6, TNF, BCL2, IL1B	6	43	89	13528	21.2093	7.72609e-06	0.0118048	0.000296832	0.0128742
GO:0043523~regulation of neuron apoptosis	TNF, BCL2, ESR1, TP53, NQO1, SOD2	6	43	90	13528	20.9736	8.16192e-06	0.0124666	0.000305927	0.0136004
GO:0051247~positive regulation of protein metabolic process	EDNRB, CCND1, IL6, TNF, BCL2, NFKBIA, IL1B, DNMT3B	8	43	243	13528	10.3574	8.73466e-06	0.0133355	0.000319597	0.0145547
GO:0006979~response to oxidative stress	EGFR, GPX2, PTGS2, HMOX1, BCL2, NQO1, SOD2	7	43	164	13528	13.4282	1.05882e-05	0.0161425	0.000378397	0.0176431
GO:0048660~regulation of smooth muscle cell proliferation	EGFR, IL6, TNF, PTGS2, NOS3	5	43	46	13528	34.1962	1.19145e-05	0.0181461	0.000416112	0.0198529
GO:0032642~regulation of chemokine production	IL6, TNF, HMOX1, IL1B	4	43	15	13528	83.8946	1.23374e-05	0.018784	0.000421303	0.0205574
GO:0009725~response to hormone stimulus	CCND1, IL6, TNF, PTGS2, HMOX1, BCL2, ESR1, IL1B, NOS3	9	43	367	13528	7.7151	1.4314e-05	0.0217605	0.000478163	0.0238506
GO:0001932~regulation of protein amino acid phosphorylation	EGFR, EDNRB, CCND1, IL6, TNF, BCL2, IL1B	7	43	173	13528	12.7297	1.43614e-05	0.0218318	0.000469543	0.0239297
GO:0009628~response to abiotic stimulus	EGFR, CCND1, TNF, BCL2, TP53, IL1B, NOS3, DNMT3B, SOD2	9	43	368	13528	7.69414	1.45989e-05	0.0221889	0.000467365	0.0243254
GO:0051329~interphase of mitotic cell cycle	E2F1, EGFR, CCND1, CDKN1B, BCL2, BIRC5	6	43	103	13528	18.3265	1.57823e-05	0.0239658	0.000494931	0.0262969
GO:0051325~interphase	E2F1, EGFR, CCND1, CDKN1B, BCL2, BIRC5	6	43	106	13528	17.8078	1.81455e-05	0.0275046	0.000557643	0.030234
GO:0031401~positive regulation of protein modification process	EDNRB, CCND1, IL6, TNF, BCL2, IL1B, DNMT3B	7	43	187	13528	11.7766	2.23318e-05	0.0337419	0.000672799	0.0372079
GO:0050900~leukocyte migration	EDNRB, IL6, TNF, CXCL3, IL1B	5	43	57	13528	27.5969	2.81365e-05	0.0423247	0.000831317	0.0468773
GO:0031399~regulation of protein modification process	EGFR, EDNRB, CCND1, IL6, TNF, BCL2, IL1B, DNMT3B	8	43	295	13528	8.53165	3.06132e-05	0.0459634	0.000887402	0.0510026
GO:0010212~response to ionizing radiation	CCND1, BCL2, TP53, DNMT3B, SOD2	5	43	60	13528	26.2171	3.45009e-05	0.0516474	0.000981534	0.057478
GO:0045429~positive regulation of nitric oxide biosynthetic process	EGFR, TNF, IL1B, SOD2	4	43	21	13528	59.9247	3.55982e-05	0.0532455	0.000994331	0.0593055
GO:0043065~positive regulation of apoptosis	CDKN1B, TNF, PTGS2, HMOX1, BCL2, TP53, IL1B, NQO1, TOP2A	9	43	430	13528	6.58475	4.45662e-05	0.0662064	0.00122246	0.0742408
GO:0010038~response to metal ion	EGFR, CCND1, PTGS2, CYP1A1, BCL2, NOS3	6	43	129	13528	14.6328	4.67625e-05	0.0693534	0.00126018	0.0778981
GO:0043068~positive regulation of programmed cell death	CDKN1B, TNF, PTGS2, HMOX1, BCL2, TP53, IL1B, NQO1, TOP2A	9	43	433	13528	6.53913	4.68166e-05	0.0694308	0.0012399	0.0779882
GO:0043271~negative regulation of ion transport	TNF, PTGS2, BCL2, NOS3	4	43	23	13528	54.7139	4.71974e-05	0.0699752	0.0012288	0.0786222
GO:0010942~positive regulation of cell death	CDKN1B, TNF, PTGS2, HMOX1, BCL2, TP53, IL1B, NQO1, TOP2A	9	43	435	13528	6.50906	4.83691e-05	0.0716487	0.00123832	0.0805734
GO:0033273~response to vitamin	CCND1, PTGS2, CYP1A1, BCL2, IL1B	5	43	66	13528	23.8337	5.03095e-05	0.0744135	0.00126686	0.0838045
GO:0001666~response to hypoxia	CYP1A1, HMOX1, BCL2, NOS3, MMP2, SOD2	6	43	134	13528	14.0868	5.60796e-05	0.0825864	0.00138931	0.093412
GO:0014805~smooth muscle adaptation	HMOX1, IL1B, NOS3	3	43	4	13528	235.953	5.62387e-05	0.0828106	0.00137114	0.0936768
GO:0006954~inflammatory response	IL6, TNF, CCL20, HMOX1, CXCL3, CXCL2, IL1B, CD40	8	43	325	13528	7.74411	5.66826e-05	0.0834363	0.00136038	0.0944159
GO:0010647~positive regulation of cell communication	EGFR, IL6, TNF, PTGS2, HMOX1, ESR1, IL1B, CD40	8	43	329	13528	7.64996	6.12366e-05	0.0898297	0.00144701	0.101998
GO:0019221~cytokine-mediated signaling pathway	IL6, KRT18, TNF, KRT8, IL1B	5	43	70	13528	22.4718	6.34312e-05	0.0928947	0.00147613	0.105651
GO:0032880~regulation of protein localization	IL6, TNF, BCL2, NFKBIA, IL1B, CD40	6	43	138	13528	13.6785	6.4517e-05	0.0944075	0.00147899	0.107459
GO:0007584~response to nutrient	CCND1, PTGS2, CYP1A1, HMOX1, BCL2, IL1B	6	43	140	13528	13.4831	6.90872e-05	0.100747	0.00156041	0.115067
GO:0070482~response to oxygen levels	CYP1A1, HMOX1, BCL2, NOS3, MMP2, SOD2	6	43	141	13528	13.3874	7.14639e-05	0.104026	0.00159068	0.119023
GO:0045428~regulation of nitric oxide biosynthetic process	EGFR, TNF, IL1B, SOD2	4	43	27	13528	46.6081	7.72807e-05	0.112001	0.00169549	0.128705
GO:0007610~behavior	EDNRB, IL6, PTGS2, CCL20, CXCL3, BCL2, CXCL2, IL1B, SOD2	9	43	469	13528	6.03719	8.21332e-05	0.1186	0.0017765	0.136782
GO:0032268~regulation of cellular protein metabolic process	EGFR, EDNRB, CCND1, IL6, TNF, BCL2, NFKBIA, IL1B, DNMT3B	9	43	474	13528	5.97351	8.84504e-05	0.127118	0.00188647	0.147295
GO:0006928~cell motion	EDNRB, IL6, TNF, PTGS2, SERPINB5, CXCL3, CFL1, IL1B, NOS3	9	43	475	13528	5.96093	8.97612e-05	0.128874	0.0018882	0.149476
GO:0032496~response to lipopolysaccharide	PTGS2, CYP1A1, NFKBIA, IL1B, NOS3	5	43	77	13528	20.4289	9.21603e-05	0.132081	0.00191245	0.153468
GO:0051098~regulation of binding	IL6, TNF, HMOX1, BCL2, NFKBIA, IL1B	6	43	153	13528	12.3374	0.000105203	0.149308	0.00215375	0.175169
GO:0048661~positive regulation of smooth muscle cell proliferation	EGFR, IL6, TNF, PTGS2	4	43	31	13528	40.5941	0.000117739	0.165545	0.00237843	0.196024
GO:0010638~positive regulation of organelle organization	CDKN1B, TNF, CFL1, IL1B, DNMT3B	5	43	83	13528	18.9521	0.000123471	0.172865	0.00246173	0.205557
GO:0051173~positive regulation of nitrogen compound metabolic process	E2F1, EGFR, IL6, TNF, TP53, NFKBIA, IL1B, CD40, AREG, SOD2	10	43	644	13528	4.88517	0.000128828	0.179647	0.00253551	0.214466
GO:0042330~taxis	EDNRB, IL6, CCL20, CXCL3, CXCL2, IL1B	6	43	160	13528	11.7977	0.000129868	0.180958	0.00252365	0.216196
GO:0006935~chemotaxis	EDNRB, IL6, CCL20, CXCL3, CXCL2, IL1B	6	43	160	13528	11.7977	0.000129868	0.180958	0.00252365	0.216196
GO:0007626~locomotory behavior	EDNRB, IL6, CCL20, CXCL3, CXCL2, IL1B, SOD2	7	43	274	13528	8.03735	0.000185797	0.248435	0.0035636	0.309169
GO:0016477~cell migration	EDNRB, IL6, TNF, CXCL3, CFL1, IL1B, NOS3	7	43	276	13528	7.9791	0.000193274	0.257024	0.00366107	0.321591
GO:0045080~positive regulation of chemokine biosynthetic process	TNF, HMOX1, IL1B	3	43	7	13528	134.831	0.000195674	0.25976	0.00366134	0.325579
GO:0043086~negative regulation of catalytic activity	EDNRB, CDKN1B, TP53, IL1B, NOS3, BIRC5, NQO1	7	43	277	13528	7.9503	0.000197101	0.261382	0.00364364	0.327949
GO:0030595~leukocyte chemotaxis	EDNRB, IL6, CXCL3, IL1B	4	43	37	13528	34.0113	0.000200903	0.265687	0.00366967	0.334266
GO:0031328~positive regulation of cellular biosynthetic process	E2F1, EGFR, IL6, TNF, HMOX1, TP53, NFKBIA, IL1B, AREG, SOD2	10	43	685	13528	4.59277	0.00020534	0.270678	0.00370652	0.341635
GO:0009891~positive regulation of biosynthetic process	E2F1, EGFR, IL6, TNF, HMOX1, TP53, NFKBIA, IL1B, AREG, SOD2	10	43	695	13528	4.52669	0.00022889	0.29661	0.00408286	0.380747
GO:0060326~cell chemotaxis	EDNRB, IL6, CXCL3, IL1B	4	43	39	13528	32.2671	0.000235283	0.303489	0.00414852	0.391361
GO:0001775~cell activation	EGFR, IL6, ADAM10, TNF, BCL2, TP53, CD40	7	43	287	13528	7.67328	0.000238767	0.30721	0.0041621	0.397146
GO:0008217~regulation of blood pressure	EDNRB, PTGS2, HMOX1, NOS3, SOD2	5	43	100	13528	15.7302	0.000253611	0.322841	0.00437075	0.421787
GO:0055093~response to hyperoxia	CYP1A1, NOS3, SOD2	3	43	8	13528	117.977	0.000260385	0.329857	0.0044375	0.433031
GO:0003013~circulatory system process	EDNRB, MTHFR, PTGS2, HMOX1, NOS3, SOD2	6	43	186	13528	10.1485	0.000262167	0.33169	0.00441882	0.435988
GO:0008015~blood circulation	EDNRB, MTHFR, PTGS2, HMOX1, NOS3, SOD2	6	43	186	13528	10.1485	0.000262167	0.33169	0.00441882	0.435988
GO:0002697~regulation of immune effector process	IL6, TNF, HMOX1, IL1B, CD40	5	43	101	13528	15.5745	0.000263477	0.333035	0.00439269	0.438163
GO:0002700~regulation of production of molecular mediator of immune response	IL6, TNF, HMOX1, CD40	4	43	41	13528	30.6931	0.000273259	0.34299	0.00450654	0.454394
GO:0051090~regulation of transcription factor activity	IL6, TNF, HMOX1, NFKBIA, IL1B	5	43	103	13528	15.2721	0.000284035	0.353785	0.00463416	0.472274
GO:0051270~regulation of cell motion	EGFR, IL6, CDKN1B, ADAM10, HMOX1, BCL2	6	43	193	13528	9.78046	0.000310978	0.380007	0.00501943	0.516963
GO:0051023~regulation of immunoglobulin secretion	IL6, TNF, CD40	3	43	9	13528	104.868	0.000334122	0.401681	0.00533603	0.555337
GO:0048870~cell motility	EDNRB, IL6, TNF, CXCL3, CFL1, IL1B, NOS3	7	43	307	13528	7.1734	0.000342842	0.409649	0.00541865	0.569792
GO:0051674~localization of cell	EDNRB, IL6, TNF, CXCL3, CFL1, IL1B, NOS3	7	43	307	13528	7.1734	0.000342842	0.409649	0.00541865	0.569792
GO:0008283~cell proliferation	E2F1, EGFR, CYP1A1, HMOX1, BCL2, TP53, CD40, AREG	8	43	436	13528	5.77256	0.000349569	0.415724	0.00546848	0.580941
GO:0044057~regulation of system process	EGFR, EDNRB, TNF, PTGS2, HMOX1, IL1B, NOS3	7	43	309	13528	7.12697	0.000354946	0.420534	0.00549644	0.589852
GO:0007568~aging	BCL2, TP53, IL1B, NOS3, SOD2	5	43	110	13528	14.3002	0.00036511	0.429519	0.00559704	0.606694
GO:0009314~response to radiation	EGFR, CCND1, BCL2, TP53, DNMT3B, SOD2	6	43	200	13528	9.43814	0.000366405	0.430654	0.00556138	0.60884
GO:0044093~positive regulation of molecular function	EGFR, EDNRB, CCND1, IL6, TNF, BCL2, TP53, IL1B, NOS3	9	43	586	13528	4.83181	0.000378237	0.440919	0.00568437	0.628443
GO:0033209~tumor necrosis factor-mediated signaling pathway	KRT18, TNF, KRT8	3	43	10	13528	94.3814	0.00041683	0.47313	0.00620205	0.692356
GO:0051223~regulation of protein transport	IL6, TNF, NFKBIA, IL1B, CD40	5	43	114	13528	13.7984	0.000418241	0.474272	0.00616334	0.694692
GO:0001503~ossification	EGFR, PTGS2, BCL2, GPNMB, MMP2	5	43	115	13528	13.6785	0.000432343	0.485549	0.00631005	0.718036
GO:0042325~regulation of phosphorylation	EGFR, EDNRB, CCND1, IL6, CDKN1B, TNF, BCL2, IL1B	8	43	466	13528	5.40094	0.000521574	0.55151	0.00753626	0.865627
GO:0006952~defense response	IL6, TNF, CCL20, HMOX1, CXCL3, BCL2, CXCL2, IL1B, CD40	9	43	615	13528	4.60397	0.000522169	0.55192	0.00747457	0.86661
GO:0070201~regulation of establishment of protein localization	IL6, TNF, NFKBIA, IL1B, CD40	5	43	121	13528	13.0002	0.000524185	0.553307	0.00743411	0.869942
GO:0051101~regulation of DNA binding	IL6, TNF, HMOX1, NFKBIA, IL1B	5	43	121	13528	13.0002	0.000524185	0.553307	0.00743411	0.869942
GO:0060348~bone development	EGFR, PTGS2, BCL2, GPNMB, MMP2	5	43	123	13528	12.7888	0.000557666	0.575724	0.00783494	0.925265
GO:0051926~negative regulation of calcium ion transport	PTGS2, BCL2, NOS3	3	43	12	13528	78.6512	0.000608946	0.607899	0.00847511	1.00994
GO:0043500~muscle adaptation	HMOX1, IL1B, NOS3	3	43	12	13528	78.6512	0.000608946	0.607899	0.00847511	1.00994
GO:0010039~response to iron ion	CCND1, CYP1A1, BCL2	3	43	12	13528	78.6512	0.000608946	0.607899	0.00847511	1.00994
GO:0019220~regulation of phosphate metabolic process	EGFR, EDNRB, CCND1, IL6, CDKN1B, TNF, BCL2, IL1B	8	43	485	13528	5.18936	0.000661687	0.638448	0.00912344	1.09696
GO:0051174~regulation of phosphorus metabolic process	EGFR, EDNRB, CCND1, IL6, CDKN1B, TNF, BCL2, IL1B	8	43	485	13528	5.18936	0.000661687	0.638448	0.00912344	1.09696
GO:0000082~G1/S transition of mitotic cell cycle	EGFR, CCND1, CDKN1B, BCL2	4	43	56	13528	22.4718	0.000687958	0.652766	0.00939978	1.14028
GO:0032583~regulation of gene-specific transcription	IL6, CDKN1B, TNF, TP53, NFKBIA	5	43	134	13528	11.739	0.00076956	0.693724	0.0104168	1.27472
GO:0009411~response to UV	EGFR, CCND1, BCL2, TP53	4	43	59	13528	21.3291	0.000801613	0.708459	0.0107538	1.32748
GO:0045069~regulation of viral genome replication	TNF, BCL2, TOP2A	3	43	14	13528	67.4153	0.000836307	0.72361	0.0111198	1.38456
GO:0007005~mitochondrion organization	BCL2, TP53, SYNJ2, NOS3, SOD2	5	43	138	13528	11.3987	0.000859058	0.733116	0.0113228	1.42197
GO:0050931~pigment cell differentiation	EDNRB, BCL2, SOD2	3	43	15	13528	62.9209	0.000963071	0.772579	0.012578	1.59285
GO:0045765~regulation of angiogenesis	IL6, HMOX1, IL1B, NOS3	4	43	63	13528	19.9749	0.000970801	0.775268	0.0125715	1.60553
GO:0010243~response to organic nitrogen	CCND1, PTGS2, CFL1, NOS3	4	43	63	13528	19.9749	0.000970801	0.775268	0.0125715	1.60553
GO:0060341~regulation of cellular localization	IL6, TNF, HMOX1, NFKBIA, IL1B, CD40	6	43	248	13528	7.6114	0.000972339	0.775799	0.0124862	1.60806
GO:0043085~positive regulation of catalytic activity	EGFR, EDNRB, CCND1, TNF, BCL2, TP53, IL1B, NOS3	8	43	520	13528	4.84007	0.000997414	0.784283	0.0127002	1.6492
GO:0007242~intracellular signaling cascade	EGFR, EDNRB, CCND1, TNF, HMOX1, CFL1, ESR1, TP53, NFKBIA, IL1B, TOP2A, TANK	12	43	1256	13528	3.00578	0.00121411	0.845448	0.0153132	2.00411
GO:0032535~regulation of cellular component size	CDKN1B, ADAM10, BCL2, CFL1, TP53, ENO1	6	43	271	13528	6.96542	0.00144263	0.891273	0.0180234	2.37707
GO:0032101~regulation of response to external stimulus	GPX2, IL6, ADAM10, PTGS2, NOS3	5	43	159	13528	9.89323	0.00145283	0.892968	0.0180036	2.39369
GO:0042035~regulation of cytokine biosynthetic process	IL6, TNF, HMOX1, IL1B	4	43	74	13528	17.0057	0.00154765	0.907503	0.0190151	2.54803
GO:0032755~positive regulation of interleukin-6 production	IL6, TNF, IL1B	3	43	19	13528	49.6744	0.00155613	0.908703	0.0189669	2.56182
GO:0051094~positive regulation of developmental process	IL6, TNF, BCL2, IL1B, NOS3, DNMT3B	6	43	278	13528	6.79003	0.00161441	0.916538	0.0195162	2.65656
GO:0051241~negative regulation of multicellular organismal process	IL6, TNF, PTGS2, HMOX1, NOS3	5	43	164	13528	9.59161	0.00162799	0.918264	0.0195254	2.67862
GO:0033554~cellular response to stress	CCND1, XRCC3, TNF, HMOX1, BCL2, TP53, TOP2A, SOD2	8	43	566	13528	4.44671	0.00162975	0.918486	0.0193952	2.68149
GO:0002685~regulation of leukocyte migration	IL6, ADAM10, HMOX1	3	43	20	13528	47.1907	0.00172564	0.929673	0.020368	2.83712
GO:0010740~positive regulation of protein kinase cascade	IL6, TNF, HMOX1, IL1B, CD40	5	43	167	13528	9.4193	0.00173987	0.931197	0.0203781	2.8602
GO:0003012~muscle system process	ALDOA, EDNRB, HMOX1, IL1B, NOS3	5	43	168	13528	9.36323	0.00177833	0.935153	0.0206668	2.92254
GO:0030334~regulation of cell migration	EGFR, IL6, ADAM10, HMOX1, BCL2	5	43	169	13528	9.30783	0.00181737	0.938936	0.0209578	2.9858
GO:0055080~cation homeostasis	EDNRB, HMOX1, BCL2, TP53, IL1B, SOD2	6	43	286	13528	6.6001	0.00182873	0.939996	0.0209308	3.0042
GO:0034097~response to cytokine stimulus	ADAM10, PTGS2, BCL2, NOS3	4	43	79	13528	15.9293	0.00186779	0.943497	0.0212155	3.06742
GO:0001836~release of cytochrome c from mitochondria	BCL2, TP53, SOD2	3	43	21	13528	44.9435	0.00190354	0.946524	0.0214592	3.12526
GO:0050792~regulation of viral reproduction	TNF, BCL2, TOP2A	3	43	21	13528	44.9435	0.00190354	0.946524	0.0214592	3.12526
GO:0042592~homeostatic process	GPX2, ALDOA, EDNRB, IL6, HMOX1, BCL2, TP53, IL1B, SOD2	9	43	751	13528	3.77023	0.00190701	0.94681	0.0213416	3.13088
GO:0045786~negative regulation of cell cycle	EGFR, CDKN1B, BCL2, TP53	4	43	81	13528	15.536	0.00200655	0.954369	0.022282	3.29174
GO:0050865~regulation of cell activation	IL6, HMOX1, IL1B, NOS3, CD40	5	43	175	13528	8.9887	0.00206423	0.958248	0.0227517	3.38484
GO:0043525~positive regulation of neuron apoptosis	TNF, TP53, NQO1	3	43	22	13528	42.9006	0.00208978	0.959859	0.0228665	3.42605
GO:0009967~positive regulation of signal transduction	IL6, TNF, HMOX1, ESR1, IL1B, CD40	6	43	295	13528	6.39874	0.0020941	0.960125	0.0227516	3.43303
GO:0010332~response to gamma radiation	BCL2, TP53, SOD2	3	43	23	13528	41.0354	0.00228431	0.970252	0.0246209	3.7393
GO:0051130~positive regulation of cellular component organization	CDKN1B, TNF, CFL1, IL1B, DNMT3B	5	43	181	13528	8.69074	0.00233343	0.97242	0.0249694	3.81825
GO:0001817~regulation of cytokine production	IL6, TNF, HMOX1, IL1B, CD40	5	43	181	13528	8.69074	0.00233343	0.97242	0.0249694	3.81825
GO:0043193~positive regulation of gene-specific transcription	IL6, TNF, TP53, NFKBIA	4	43	87	13528	14.4646	0.00246084	0.977336	0.0261347	4.02272
GO:0001101~response to acid	BCL2, CFL1, NOS3	3	43	24	13528	39.3256	0.00248708	0.978234	0.0262291	4.0648
GO:0030335~positive regulation of cell migration	EGFR, IL6, ADAM10, BCL2	4	43	89	13528	14.1395	0.00262526	0.982408	0.0274797	4.28601
GO:0032768~regulation of monooxygenase activity	EGFR, TNF, IL1B	3	43	25	13528	37.7526	0.00269804	0.984275	0.0280411	4.40234
GO:0001819~positive regulation of cytokine production	IL6, TNF, IL1B, CD40	4	43	90	13528	13.9824	0.00270996	0.984561	0.0279744	4.42137
GO:0030308~negative regulation of cell growth	CDKN1B, BCL2, TP53, ENO1	4	43	92	13528	13.6785	0.00288438	0.988201	0.0295525	4.69956
GO:0040012~regulation of locomotion	EGFR, IL6, ADAM10, HMOX1, BCL2	5	43	192	13528	8.19283	0.00288832	0.988272	0.0293967	4.70584
GO:0002637~regulation of immunoglobulin production	IL6, TNF, CD40	3	43	26	13528	36.3005	0.00291714	0.988782	0.0294911	4.75172
GO:0048066~pigmentation during development	EDNRB, BCL2, SOD2	3	43	26	13528	36.3005	0.00291714	0.988782	0.0294911	4.75172
GO:0001558~regulation of cell growth	CDKN1B, ADAM10, BCL2, TP53, ENO1	5	43	194	13528	8.10837	0.00299812	0.990098	0.0301008	4.88055
GO:0055114~oxidation reduction	GPX2, MTHFR, PTGS2, CYP1A1, HMOX1, NOS3, NQO1, SOD2	8	43	639	13528	3.93871	0.00323509	0.993129	0.0322347	5.2566
GO:0043123~positive regulation of I-kappaB kinase/NF-kappaB cascade	TNF, HMOX1, IL1B, CD40	4	43	97	13528	12.9734	0.00335031	0.994247	0.033151	5.43894
GO:0040017~positive regulation of locomotion	EGFR, IL6, ADAM10, BCL2	4	43	98	13528	12.841	0.0034487	0.995057	0.0338917	5.59438
GO:0051272~positive regulation of cell motion	EGFR, IL6, ADAM10, BCL2	4	43	98	13528	12.841	0.0034487	0.995057	0.0338917	5.59438
GO:0051046~regulation of secretion	IL6, TNF, HMOX1, IL1B, CD40	5	43	202	13528	7.78724	0.00346598	0.995187	0.0338429	5.62166
GO:0045792~negative regulation of cell size	CDKN1B, BCL2, TP53, ENO1	4	43	99	13528	12.7113	0.00354885	0.995765	0.0344211	5.75236
GO:0043269~regulation of ion transport	TNF, PTGS2, BCL2, NOS3	4	43	99	13528	12.7113	0.00354885	0.995765	0.0344211	5.75236
GO:0010557~positive regulation of macromolecule biosynthetic process	E2F1, IL6, TNF, HMOX1, TP53, NFKBIA, IL1B, AREG	8	43	654	13528	3.84837	0.00367933	0.996537	0.035443	5.9578
GO:0008361~regulation of cell size	CDKN1B, ADAM10, BCL2, TP53, ENO1	5	43	206	13528	7.63604	0.00371762	0.996735	0.0355833	6.01801
GO:0051336~regulation of hydrolase activity	EGFR, EDNRB, TNF, TP53, NOS3, BIRC5	6	43	337	13528	5.60127	0.00371854	0.99674	0.0353722	6.01947
GO:0008637~apoptotic mitochondrial changes	BCL2, TP53, SOD2	3	43	31	13528	30.4456	0.00413298	0.99828	0.0390037	6.66883
GO:0006970~response to osmotic stress	EGFR, TNF, TP53	3	43	32	13528	29.4942	0.00439987	0.998861	0.0412227	7.08478
GO:0043122~regulation of I-kappaB kinase/NF-kappaB cascade	TNF, HMOX1, IL1B, CD40	4	43	107	13528	11.7609	0.00441448	0.998886	0.041107	7.10749
GO:0033043~regulation of organelle organization	CDKN1B, TNF, CFL1, IL1B, DNMT3B	5	43	217	13528	7.24896	0.00447322	0.998983	0.0413935	7.19879
GO:0009615~response to virus	IL6, TNF, CYP1A1, BCL2	4	43	109	13528	11.5451	0.00464913	0.999225	0.0427331	7.47167
GO:0045892~negative regulation of transcription, DNA-dependent	E2F1, CDKN1B, TNF, TP53, DNMT3B, ENO1	6	43	356	13528	5.30233	0.00469241	0.999275	0.0428674	7.53869
GO:0045926~negative regulation of growth	CDKN1B, BCL2, TP53, ENO1	4	43	110	13528	11.4402	0.00476924	0.999356	0.0432988	7.65756
GO:0006955~immune response	IL6, TNF, CCL20, CXCL3, BCL2, CXCL2, TP53, IL1B	8	43	690	13528	3.64759	0.00493655	0.999503	0.0445248	7.91591
GO:0050806~positive regulation of synaptic transmission	EGFR, TNF, PTGS2	3	43	34	13528	27.7592	0.00495698	0.999518	0.0444453	7.94741
GO:0000060~protein import into nucleus, translocation	TNF, TP53, NFKBIA	3	43	34	13528	27.7592	0.00495698	0.999518	0.0444453	7.94741
GO:0051253~negative regulation of RNA metabolic process	E2F1, CDKN1B, TNF, TP53, DNMT3B, ENO1	6	43	362	13528	5.21444	0.00503461	0.999573	0.0448662	8.06702
GO:0010564~regulation of cell cycle process	TNF, CYP1A1, IL1B, BIRC5	4	43	114	13528	11.0388	0.00526846	0.999702	0.0466365	8.42643
GO:0007243~protein kinase cascade	EGFR, TNF, HMOX1, NFKBIA, IL1B, TANK	6	43	370	13528	5.1017	0.00551814	0.999798	0.0485195	8.80871
GO:0000278~mitotic cell cycle	E2F1, EGFR, CCND1, CDKN1B, BCL2, BIRC5	6	43	370	13528	5.1017	0.00551814	0.999798	0.0485195	8.80871
GO:0032675~regulation of interleukin-6 production	IL6, TNF, IL1B	3	43	36	13528	26.2171	0.00554487	0.999806	0.0484729	8.84955
GO:0048565~gut development	EDNRB, CYP1A1, BCL2	3	43	36	13528	26.2171	0.00554487	0.999806	0.0484729	8.84955
GO:0006974~response to DNA damage stimulus	CCND1, XRCC3, HMOX1, TP53, TOP2A, SOD2	6	43	373	13528	5.06066	0.0057077	0.999849	0.0495832	9.09793
GO:0051971~positive regulation of transmission of nerve impulse	EGFR, TNF, PTGS2	3	43	37	13528	25.5085	0.00585024	0.999879	0.0505087	9.31486
GO:0048584~positive regulation of response to stimulus	IL6, ADAM10, TNF, NFKBIA, IL1B	5	43	236	13528	6.66535	0.00601177	0.999906	0.051582	9.56009
GO:0002684~positive regulation of immune system process	IL6, ADAM10, NFKBIA, IL1B, CD40	5	43	238	13528	6.60934	0.00619184	0.999929	0.0527964	9.83273
GO:0014806~smooth muscle hyperplasia	HMOX1, NOS3	2	43	2	13528	314.605	0.00619993	0.999929	0.052573	9.84496
GO:0002439~chronic inflammatory response to antigenic stimulus	TNF, IL1B	2	43	2	13528	314.605	0.00619993	0.999929	0.052573	9.84496
GO:0034116~positive regulation of heterotypic cell-cell adhesion	TNF, IL1B	2	43	2	13528	314.605	0.00619993	0.999929	0.052573	9.84496
GO:0055066~di-, tri-valent inorganic cation homeostasis	EDNRB, HMOX1, BCL2, IL1B, SOD2	5	43	239	13528	6.58169	0.00628322	0.999938	0.0529711	9.97078
GO:0010558~negative regulation of macromolecule biosynthetic process	E2F1, IL6, CDKN1B, TNF, TP53, DNMT3B, ENO1	7	43	547	13528	4.02602	0.00646315	0.999953	0.054155	10.2421
GO:0031646~positive regulation of neurological system process	EGFR, TNF, PTGS2	3	43	39	13528	24.2004	0.00648359	0.999954	0.0540286	10.2728
GO:0006357~regulation of transcription from RNA polymerase II promoter	E2F1, IL6, TNF, HMOX1, TP53, NFKBIA, SOD2, ENO1	8	43	727	13528	3.46195	0.00654492	0.999959	0.0542342	10.3651
GO:0051341~regulation of oxidoreductase activity	EGFR, TNF, IL1B	3	43	40	13528	23.5953	0.00681147	0.999973	0.0560858	10.765
GO:0051092~positive regulation of NF-kappaB transcription factor activity	IL6, TNF, IL1B	3	43	41	13528	23.0199	0.00714676	0.999984	0.058462	11.2657
GO:0010627~regulation of protein kinase cascade	IL6, TNF, HMOX1, IL1B, CD40	5	43	249	13528	6.31736	0.0072469	0.999986	0.0589468	11.4147
GO:0031327~negative regulation of cellular biosynthetic process	E2F1, IL6, CDKN1B, TNF, TP53, DNMT3B, ENO1	7	43	561	13528	3.92555	0.00728861	0.999987	0.0589663	11.4767
GO:0046651~lymphocyte proliferation	BCL2, TP53, CD40	3	43	42	13528	22.4718	0.00748942	0.99999	0.0602311	11.7747
GO:0022402~cell cycle process	E2F1, EGFR, CCND1, CDKN1B, BCL2, TP53, BIRC5	7	43	565	13528	3.89776	0.00753798	0.999991	0.0602969	11.8466
GO:0009890~negative regulation of biosynthetic process	E2F1, IL6, CDKN1B, TNF, TP53, DNMT3B, ENO1	7	43	573	13528	3.84334	0.00805531	0.999996	0.0639844	12.6092
GO:0032943~mononuclear cell proliferation	BCL2, TP53, CD40	3	43	44	13528	21.4503	0.00819664	0.999997	0.0647412	12.8164
GO:0070661~leukocyte proliferation	BCL2, TP53, CD40	3	43	44	13528	21.4503	0.00819664	0.999997	0.0647412	12.8164
GO:0050801~ion homeostasis	EDNRB, HMOX1, BCL2, TP53, IL1B, SOD2	6	43	409	13528	4.61523	0.00835663	0.999997	0.0656319	13.0505
GO:0010628~positive regulation of gene expression	E2F1, IL6, TNF, ESR1, TP53, NFKBIA, DNMT3B	7	43	581	13528	3.79042	0.00859799	0.999998	0.0671289	13.4025
GO:0030155~regulation of cell adhesion	ADAM10, TNF, BCL2, IL1B	4	43	137	13528	9.18554	0.00874365	0.999999	0.0678882	13.6143
GO:0022403~cell cycle phase	E2F1, EGFR, CCND1, CDKN1B, BCL2, BIRC5	6	43	414	13528	4.55949	0.00878238	0.999999	0.0678388	13.6705
GO:0009416~response to light stimulus	EGFR, CCND1, BCL2, TP53	4	43	138	13528	9.11898	0.00891886	0.999999	0.0685179	13.8684
GO:0007049~cell cycle	E2F1, EGFR, CCND1, CDKN1B, KRT18, BCL2, TP53, BIRC5	8	43	776	13528	3.24335	0.00924652	0.999999	0.0706042	14.3417
GO:0034114~regulation of heterotypic cell-cell adhesion	TNF, IL1B	2	43	3	13528	209.736	0.00928581	0.999999	0.0705461	14.3983
GO:0070141~response to UV-A	EGFR, CCND1	2	43	3	13528	209.736	0.00928581	0.999999	0.0705461	14.3983
GO:0030730~sequestering of triglyceride	TNF, IL1B	2	43	3	13528	209.736	0.00928581	0.999999	0.0705461	14.3983
GO:0010470~regulation of gastrulation	TNF, IL1B	2	43	3	13528	209.736	0.00928581	0.999999	0.0705461	14.3983
GO:0070587~regulation of cell-cell adhesion involved in gastrulation	TNF, IL1B	2	43	3	13528	209.736	0.00928581	0.999999	0.0705461	14.3983
GO:0060559~positive regulation of calcidiol 1-monooxygenase activity	TNF, IL1B	2	43	3	13528	209.736	0.00928581	0.999999	0.0705461	14.3983
GO:0051346~negative regulation of hydrolase activity	TP53, NOS3, BIRC5	3	43	48	13528	19.6628	0.00969738	1	0.0732102	14.989
GO:0043410~positive regulation of MAPKKK cascade	IL6, TNF, IL1B	3	43	48	13528	19.6628	0.00969738	1	0.0732102	14.989
GO:0042108~positive regulation of cytokine biosynthetic process	TNF, HMOX1, IL1B	3	43	48	13528	19.6628	0.00969738	1	0.0732102	14.989
GO:0014031~mesenchymal cell development	EDNRB, BCL2, CFL1	3	43	51	13528	18.5062	0.010897	1	0.0815371	16.6889
GO:0048762~mesenchymal cell differentiation	EDNRB, BCL2, CFL1	3	43	51	13528	18.5062	0.010897	1	0.0815371	16.6889
GO:0060485~mesenchyme development	EDNRB, BCL2, CFL1	3	43	52	13528	18.1503	0.0113108	1	0.084109	17.2677
GO:0001889~liver development	CCND1, CYP1A1, SOD2	3	43	53	13528	17.8078	0.0117314	1	0.086698	17.8523
GO:0035150~regulation of tube size	EDNRB, NOS3, SOD2	3	43	53	13528	17.8078	0.0117314	1	0.086698	17.8523
GO:0050880~regulation of blood vessel size	EDNRB, NOS3, SOD2	3	43	53	13528	17.8078	0.0117314	1	0.086698	17.8523
GO:0033157~regulation of intracellular protein transport	TNF, NFKBIA, IL1B	3	43	53	13528	17.8078	0.0117314	1	0.086698	17.8523
GO:0031644~regulation of neurological system process	EGFR, EDNRB, TNF, PTGS2	4	43	153	13528	8.22496	0.0117968	1	0.0867485	17.9429
GO:0045935~positive regulation of nucleobase, nucleoside, nucleotide and nucleic acid metabolic process	E2F1, IL6, TNF, TP53, NFKBIA, CD40, AREG	7	43	624	13528	3.52922	0.0119779	1	0.0876112	18.1931
GO:0043279~response to alkaloid	HMOX1, BCL2, IL1B	3	43	54	13528	17.478	0.0121588	1	0.0884637	18.4424
GO:0032355~response to estradiol stimulus	PTGS2, IL1B, NOS3	3	43	54	13528	17.478	0.0121588	1	0.0884637	18.4424
GO:0000079~regulation of cyclin-dependent protein kinase activity	EGFR, CCND1, CDKN1B	3	43	54	13528	17.478	0.0121588	1	0.0884637	18.4424
GO:0002437~inflammatory response to antigenic stimulus	TNF, IL1B	2	43	4	13528	157.302	0.0123623	1	0.0894644	18.7219
GO:0051048~negative regulation of secretion	TNF, HMOX1, IL1B	3	43	55	13528	17.1603	0.012593	1	0.090642	19.0377
GO:0050671~positive regulation of lymphocyte proliferation	IL6, IL1B, CD40	3	43	55	13528	17.1603	0.012593	1	0.090642	19.0377
GO:0042542~response to hydrogen peroxide	HMOX1, BCL2, SOD2	3	43	56	13528	16.8538	0.0130339	1	0.0932493	19.6381
GO:0032946~positive regulation of mononuclear cell proliferation	IL6, IL1B, CD40	3	43	56	13528	16.8538	0.0130339	1	0.0932493	19.6381
GO:0070665~positive regulation of leukocyte proliferation	IL6, IL1B, CD40	3	43	56	13528	16.8538	0.0130339	1	0.0932493	19.6381
GO:0009408~response to heat	BCL2, IL1B, NOS3	3	43	56	13528	16.8538	0.0130339	1	0.0932493	19.6381
GO:0016481~negative regulation of transcription	E2F1, CDKN1B, TNF, TP53, DNMT3B, ENO1	6	43	459	13528	4.11248	0.0133149	1	0.094736	20.0184
GO:0050708~regulation of protein secretion	IL6, TNF, CD40	3	43	58	13528	16.2727	0.0139358	1	0.098506	20.8531
GO:0046822~regulation of nucleocytoplasmic transport	TNF, NFKBIA, IL1B	3	43	58	13528	16.2727	0.0139358	1	0.098506	20.8531
GO:0003018~vascular process in circulatory system	EDNRB, NOS3, SOD2	3	43	58	13528	16.2727	0.0139358	1	0.098506	20.8531
GO:0019725~cellular homeostasis	ALDOA, EDNRB, BCL2, TP53, IL1B, SOD2	6	43	466	13528	4.0507	0.01414	1	0.099431	21.1257
GO:0043473~pigmentation	EDNRB, BCL2, SOD2	3	43	59	13528	15.9968	0.0143967	1	0.100697	21.4672
GO:0002694~regulation of leukocyte activation	IL6, HMOX1, IL1B, CD40	4	43	166	13528	7.58083	0.0146773	1	0.102109	21.839
GO:0051091~positive regulation of transcription factor activity	IL6, TNF, IL1B	3	43	60	13528	15.7302	0.0148641	1	0.102887	22.0856
GO:0009636~response to toxin	CYP1A1, BCL2, NQO1	3	43	61	13528	15.4724	0.015338	1	0.105541	22.7078
GO:0002703~regulation of leukocyte mediated immunity	HMOX1, IL1B, CD40	3	43	61	13528	15.4724	0.015338	1	0.105541	22.7078
GO:0002326~B cell lineage commitment	BCL2, TP53	2	43	5	13528	125.842	0.0154295	1	0.105672	22.8275
GO:0002360~T cell lineage commitment	BCL2, TP53	2	43	5	13528	125.842	0.0154295	1	0.105672	22.8275
GO:0006468~protein amino acid phosphorylation	EGFR, CCND1, ADAM10, TNF, BCL2, CFL1, IL1B	7	43	667	13528	3.3017	0.0162133	1	0.110287	23.8449
GO:0051271~negative regulation of cell motion	CDKN1B, HMOX1, BCL2	3	43	63	13528	14.9812	0.0163052	1	0.110397	23.9633
GO:0001501~skeletal system development	EGFR, PTGS2, BCL2, GPNMB, MMP2	5	43	319	13528	4.93111	0.0167969	1	0.113064	24.5943
GO:0051235~maintenance of location	TNF, NFKBIA, IL1B	3	43	64	13528	14.7471	0.0167983	1	0.112585	24.5961
GO:0045471~response to ethanol	CCND1, BCL2, NOS3	3	43	64	13528	14.7471	0.0167983	1	0.112585	24.5961
GO:0007292~female gamete generation	PTGS2, BCL2, NOS3	3	43	65	13528	14.5202	0.0172979	1	0.115262	25.232
GO:0051345~positive regulation of hydrolase activity	EGFR, EDNRB, TNF, TP53	4	43	179	13528	7.03027	0.0179237	1	0.1187	26.0215
GO:0051222~positive regulation of protein transport	IL6, TNF, IL1B	3	43	67	13528	14.0868	0.0183158	1	0.120642	26.5121
GO:0006800~oxygen and reactive oxygen species metabolic process	CYP1A1, BCL2, SOD2	3	43	67	13528	14.0868	0.0183158	1	0.120642	26.5121
GO:0042698~ovulation cycle	EGFR, BCL2, NOS3	3	43	67	13528	14.0868	0.0183158	1	0.120642	26.5121
GO:0002544~chronic inflammatory response	TNF, IL1B	2	43	6	13528	104.868	0.0184874	1	0.121197	26.726
GO:0010629~negative regulation of gene expression	E2F1, CDKN1B, TNF, TP53, DNMT3B, ENO1	6	43	504	13528	3.74529	0.0192289	1	0.125256	27.643
GO:0051924~regulation of calcium ion transport	PTGS2, BCL2, NOS3	3	43	69	13528	13.6785	0.0193585	1	0.125526	27.8022
GO:0043388~positive regulation of DNA binding	IL6, TNF, IL1B	3	43	70	13528	13.4831	0.0198891	1	0.128234	28.4504
GO:0032386~regulation of intracellular transport	TNF, NFKBIA, IL1B	3	43	71	13528	13.2932	0.0204258	1	0.130948	29.1005
GO:0050678~regulation of epithelial cell proliferation	EGFR, EDNRB, CDKN1B	3	43	71	13528	13.2932	0.0204258	1	0.130948	29.1005
GO:0045934~negative regulation of nucleobase, nucleoside, nucleotide and nucleic acid metabolic process	E2F1, CDKN1B, TNF, TP53, DNMT3B, ENO1	6	43	512	13528	3.68677	0.0204369	1	0.130477	29.1138
GO:0048878~chemical homeostasis	EDNRB, HMOX1, BCL2, TP53, IL1B, SOD2	6	43	512	13528	3.68677	0.0204369	1	0.130477	29.1138
GO:0040008~regulation of growth	CDKN1B, ADAM10, BCL2, TP53, ENO1	5	43	341	13528	4.61297	0.0209133	1	0.132792	29.6862
GO:0007015~actin filament organization	ALDOA, BCL2, CFL1	3	43	72	13528	13.1085	0.0209686	1	0.132581	29.7523
GO:0042060~wound healing	IL6, HMOX1, IL1B, CD40	4	43	191	13528	6.58858	0.0212492	1	0.133705	30.0871
GO:0051172~negative regulation of nitrogen compound metabolic process	E2F1, CDKN1B, TNF, TP53, DNMT3B, ENO1	6	43	519	13528	3.63705	0.0215342	1	0.134845	30.4256
GO:0060558~regulation of calcidiol 1-monooxygenase activity	TNF, IL1B	2	43	7	13528	89.887	0.0215361	1	0.134316	30.4278
GO:0051968~positive regulation of synaptic transmission, glutamatergic	EGFR, PTGS2	2	43	7	13528	89.887	0.0215361	1	0.134316	30.4278
GO:0032722~positive regulation of chemokine production	IL6, TNF	2	43	7	13528	89.887	0.0215361	1	0.134316	30.4278
GO:0032494~response to peptidoglycan	IL6, NFKBIA	2	43	7	13528	89.887	0.0215361	1	0.134316	30.4278
GO:0050665~hydrogen peroxide biosynthetic process	CYP1A1, SOD2	2	43	7	13528	89.887	0.0215361	1	0.134316	30.4278
GO:0031503~protein complex localization	BIRC5, DNMT3B	2	43	7	13528	89.887	0.0215361	1	0.134316	30.4278
GO:0045859~regulation of protein kinase activity	EGFR, CCND1, CDKN1B, TNF, IL1B	5	43	345	13528	4.55949	0.021723	1	0.134871	30.649
GO:0000302~response to reactive oxygen species	HMOX1, BCL2, SOD2	3	43	75	13528	12.5842	0.0226327	1	0.139609	31.7158
GO:0007166~cell surface receptor linked signal transduction	EGFR, EDNRB, CCND1, ADAM10, APC2, CCL20, CXCL3, CXCL2, NFKBIA, NOS3, CD40, AREG	12	43	1856	13528	2.03408	0.0231507	1	0.142038	32.3165
GO:0042113~B cell activation	BCL2, TP53, CD40	3	43	76	13528	12.4186	0.0231992	1	0.141759	32.3724
GO:0050727~regulation of inflammatory response	GPX2, IL6, PTGS2	3	43	76	13528	12.4186	0.0231992	1	0.141759	32.3724
GO:0043549~regulation of kinase activity	EGFR, CCND1, CDKN1B, TNF, IL1B	5	43	357	13528	4.40623	0.0242676	1	0.147278	33.5945
GO:0051099~positive regulation of binding	IL6, TNF, IL1B	3	43	78	13528	12.1002	0.0243497	1	0.147171	33.6877
GO:0045737~positive regulation of cyclin-dependent protein kinase activity	EGFR, CCND1	2	43	8	13528	78.6512	0.0245754	1	0.147872	33.9428
GO:0048147~negative regulation of fibroblast proliferation	TP53, SOD2	2	43	8	13528	78.6512	0.0245754	1	0.147872	33.9428
GO:0010605~negative regulation of macromolecule metabolic process	E2F1, IL6, CDKN1B, TNF, TP53, DNMT3B, ENO1	7	43	734	13528	3.00032	0.0247445	1	0.148249	34.1333
GO:0006959~humoral immune response	IL6, TNF, BCL2	3	43	79	13528	11.947	0.0249337	1	0.148736	34.346
GO:0043281~regulation of caspase activity	TNF, TP53, BIRC5	3	43	79	13528	11.947	0.0249337	1	0.148736	34.346
GO:0042770~DNA damage response, signal transduction	CCND1, HMOX1, TP53	3	43	80	13528	11.7977	0.0255234	1	0.151436	35.0045
GO:0010959~regulation of metal ion transport	PTGS2, BCL2, NOS3	3	43	81	13528	11.652	0.0261187	1	0.154138	35.6631
GO:0052548~regulation of endopeptidase activity	TNF, TP53, BIRC5	3	43	82	13528	11.5099	0.0267197	1	0.156843	36.3215
GO:0009266~response to temperature stimulus	BCL2, IL1B, NOS3	3	43	83	13528	11.3713	0.0273264	1	0.159549	36.9797
GO:0050670~regulation of lymphocyte proliferation	IL6, IL1B, CD40	3	43	83	13528	11.3713	0.0273264	1	0.159549	36.9797
GO:0045944~positive regulation of transcription from RNA polymerase II promoter	E2F1, IL6, TNF, TP53, NFKBIA	5	43	371	13528	4.23995	0.0274579	1	0.159665	37.1215
GO:0051044~positive regulation of membrane protein ectodomain proteolysis	TNF, IL1B	2	43	9	13528	69.9121	0.0276056	1	0.159868	37.2805
GO:0010574~regulation of vascular endothelial growth factor production	IL6, IL1B	2	43	9	13528	69.9121	0.0276056	1	0.159868	37.2805
GO:0051338~regulation of transferase activity	EGFR, CCND1, CDKN1B, TNF, IL1B	5	43	372	13528	4.22856	0.027695	1	0.159756	37.3765
GO:0032944~regulation of mononuclear cell proliferation	IL6, IL1B, CD40	3	43	84	13528	11.2359	0.0279386	1	0.160468	37.6374
GO:0070663~regulation of leukocyte proliferation	IL6, IL1B, CD40	3	43	84	13528	11.2359	0.0279386	1	0.160468	37.6374
GO:0006873~cellular ion homeostasis	EDNRB, BCL2, TP53, IL1B, SOD2	5	43	374	13528	4.20594	0.0281729	1	0.161125	37.8875
GO:0048871~multicellular organismal homeostasis	GPX2, BCL2, IL1B	3	43	85	13528	11.1037	0.0285563	1	0.162564	38.2946
GO:0006796~phosphate metabolic process	EGFR, CCND1, ADAM10, TNF, BCL2, CFL1, SYNJ2, IL1B	8	43	973	13528	2.58668	0.0287665	1	0.163079	38.5167
GO:0006793~phosphorus metabolic process	EGFR, CCND1, ADAM10, TNF, BCL2, CFL1, SYNJ2, IL1B	8	43	973	13528	2.58668	0.0287665	1	0.163079	38.5167
GO:0052547~regulation of peptidase activity	TNF, TP53, BIRC5	3	43	86	13528	10.9746	0.0291795	1	0.164651	38.9509
GO:0006606~protein import into nucleus	TNF, TP53, NFKBIA	3	43	86	13528	10.9746	0.0291795	1	0.164651	38.9509
GO:0045596~negative regulation of cell differentiation	CCND1, TP53, NFKBIA, SOD2	4	43	216	13528	5.82601	0.0291975	1	0.164153	38.9698
GO:0055082~cellular chemical homeostasis	EDNRB, BCL2, TP53, IL1B, SOD2	5	43	380	13528	4.13953	0.0296365	1	0.165842	39.428
GO:0051170~nuclear import	TNF, TP53, NFKBIA	3	43	88	13528	10.7252	0.0304423	1	0.169404	40.2608
GO:0002690~positive regulation of leukocyte chemotaxis	IL6, ADAM10	2	43	10	13528	62.9209	0.0306266	1	0.169749	40.4498
GO:0010829~negative regulation of glucose transport	TNF, IL1B	2	43	10	13528	62.9209	0.0306266	1	0.169749	40.4498
GO:0033138~positive regulation of peptidyl-serine phosphorylation	IL6, BCL2	2	43	10	13528	62.9209	0.0306266	1	0.169749	40.4498
GO:0045860~positive regulation of protein kinase activity	EGFR, CCND1, TNF, IL1B	4	43	223	13528	5.64313	0.0316698	1	0.174463	41.5088
GO:0051050~positive regulation of transport	IL6, TNF, NFKBIA, IL1B	4	43	223	13528	5.64313	0.0316698	1	0.174463	41.5088
GO:0000075~cell cycle checkpoint	CCND1, TP53, BIRC5	3	43	91	13528	10.3716	0.0323767	1	0.177424	42.2163
GO:0030036~actin cytoskeleton organization	ALDOA, EPB41L3, BCL2, CFL1	4	43	226	13528	5.56822	0.0327623	1	0.178743	42.5988
GO:0031663~lipopolysaccharide-mediated signaling pathway	NFKBIA, NOS3	2	43	11	13528	57.2008	0.0336384	1	0.182497	43.4591
GO:0002688~regulation of leukocyte chemotaxis	IL6, ADAM10	2	43	11	13528	57.2008	0.0336384	1	0.182497	43.4591
GO:0022409~positive regulation of cell-cell adhesion	TNF, IL1B	2	43	11	13528	57.2008	0.0336384	1	0.182497	43.4591
GO:0031571~G1 DNA damage checkpoint	CCND1, TP53	2	43	11	13528	57.2008	0.0336384	1	0.182497	43.4591
GO:0046902~regulation of mitochondrial membrane permeability	BCL2, TP53	2	43	11	13528	57.2008	0.0336384	1	0.182497	43.4591
GO:0051881~regulation of mitochondrial membrane potential	BCL2, SOD2	2	43	11	13528	57.2008	0.0336384	1	0.182497	43.4591
GO:0007423~sensory organ development	EGFR, CDKN1B, CYP1A1, BCL2	4	43	229	13528	5.49528	0.0338745	1	0.18304	43.6889
GO:0034504~protein localization in nucleus	TNF, TP53, NFKBIA	3	43	94	13528	10.0406	0.0343585	1	0.184803	44.1571
GO:0033674~positive regulation of kinase activity	EGFR, CCND1, TNF, IL1B	4	43	231	13528	5.4477	0.0346268	1	0.185491	44.4152
GO:0016310~phosphorylation	EGFR, CCND1, ADAM10, TNF, BCL2, CFL1, IL1B	7	43	800	13528	2.75279	0.0357198	1	0.190198	45.4547
GO:0019932~second-messenger-mediated signaling	EGFR, EDNRB, TNF, TOP2A	4	43	235	13528	5.35497	0.0361577	1	0.19168	45.866
GO:0051251~positive regulation of lymphocyte activation	IL6, IL1B, CD40	3	43	97	13528	9.73004	0.0363867	1	0.192141	46.0799
GO:0030097~hemopoiesis	TNF, BCL2, TP53, SOD2	4	43	236	13528	5.33228	0.0365458	1	0.192263	46.2281
GO:0006809~nitric oxide biosynthetic process	NOS3, NQO1	2	43	12	13528	52.4341	0.0366411	1	0.192078	46.3166
GO:0045909~positive regulation of vasodilation	HMOX1, NOS3	2	43	12	13528	52.4341	0.0366411	1	0.192078	46.3166
GO:0045931~positive regulation of mitotic cell cycle	CYP1A1, BIRC5	2	43	12	13528	52.4341	0.0366411	1	0.192078	46.3166
GO:0007267~cell-cell signaling	IL6, ADAM10, CCL20, IL1B, AREG, NQO1	6	43	600	13528	3.14605	0.0371183	1	0.193717	46.7581
GO:0034613~cellular protein localization	EGFR, KRT18, TNF, TP53, NFKBIA	5	43	411	13528	3.82731	0.0379171	1	0.196865	47.4893
GO:0051347~positive regulation of transferase activity	EGFR, CCND1, TNF, IL1B	4	43	240	13528	5.24341	0.0381201	1	0.197176	47.6737
GO:0048872~homeostasis of number of cells	IL6, HMOX1, BCL2	3	43	100	13528	9.43814	0.0384603	1	0.198128	47.9812
GO:0030029~actin filament-based process	ALDOA, EPB41L3, BCL2, CFL1	4	43	241	13528	5.22165	0.038519	1	0.197757	48.0342
GO:0070727~cellular macromolecule localization	EGFR, KRT18, TNF, TP53, NFKBIA	5	43	414	13528	3.79957	0.0387828	1	0.198344	48.2712
GO:0045321~leukocyte activation	ADAM10, BCL2, TP53, CD40	4	43	242	13528	5.20008	0.0389202	1	0.19834	48.3943
GO:0051043~regulation of membrane protein ectodomain proteolysis	TNF, IL1B	2	43	13	13528	48.4007	0.0396346	1	0.201004	49.0299
GO:0046209~nitric oxide metabolic process	NOS3, NQO1	2	43	13	13528	48.4007	0.0396346	1	0.201004	49.0299
GO:0032770~positive regulation of monooxygenase activity	TNF, IL1B	2	43	13	13528	48.4007	0.0396346	1	0.201004	49.0299
GO:0050995~negative regulation of lipid catabolic process	TNF, IL1B	2	43	13	13528	48.4007	0.0396346	1	0.201004	49.0299
GO:0045995~regulation of embryonic development	TNF, IL1B	2	43	13	13528	48.4007	0.0396346	1	0.201004	49.0299
GO:0042100~B cell proliferation	BCL2, CD40	2	43	13	13528	48.4007	0.0396346	1	0.201004	49.0299
GO:0043406~positive regulation of MAP kinase activity	EGFR, TNF, IL1B	3	43	102	13528	9.25308	0.0398674	1	0.20143	49.2354
GO:0001568~blood vessel development	HMOX1, IL1B, NOS3, MMP2	4	43	245	13528	5.1364	0.0401365	1	0.202019	49.4719
GO:0006355~regulation of transcription, DNA-dependent	E2F1, IL6, CDKN1B, TNF, HMOX1, ESR1, TP53, NFKBIA, DNMT3B, SOD2, ENO1	11	43	1773	13528	1.95186	0.0413649	1	0.206969	50.5387
GO:0010648~negative regulation of cell communication	CCND1, PTGS2, NFKBIA, IL1B	4	43	248	13528	5.07427	0.0413721	1	0.206347	50.545
GO:0030728~ovulation	PTGS2, NOS3	2	43	14	13528	44.9435	0.0426191	1	0.211312	51.6062
GO:0030318~melanocyte differentiation	EDNRB, BCL2	2	43	14	13528	44.9435	0.0426191	1	0.211312	51.6062
GO:0009651~response to salt stress	TNF, TP53	2	43	14	13528	44.9435	0.0426191	1	0.211312	51.6062
GO:0033135~regulation of peptidyl-serine phosphorylation	IL6, BCL2	2	43	14	13528	44.9435	0.0426191	1	0.211312	51.6062
GO:0001944~vasculature development	HMOX1, IL1B, NOS3, MMP2	4	43	251	13528	5.01362	0.042627	1	0.210686	51.6128
GO:0002696~positive regulation of leukocyte activation	IL6, IL1B, CD40	3	43	106	13528	8.90391	0.0427399	1	0.210532	51.7078
GO:0051789~response to protein stimulus	CCND1, BCL2, HSPA1B	3	43	107	13528	8.82069	0.0434699	1	0.213121	52.3178
GO:0030003~cellular cation homeostasis	EDNRB, BCL2, TP53, IL1B	4	43	254	13528	4.9544	0.0439011	1	0.214367	52.6748
GO:0043408~regulation of MAPKKK cascade	IL6, TNF, IL1B	3	43	109	13528	8.65884	0.0449439	1	0.218288	53.5277
GO:0007010~cytoskeleton organization	ALDOA, EPB41L3, BCL2, KRT8, CFL1	5	43	436	13528	3.60785	0.0454814	1	0.219967	53.9616
GO:0002687~positive regulation of leukocyte migration	IL6, ADAM10	2	43	15	13528	41.9473	0.0455946	1	0.219788	54.0524
GO:0010165~response to X-ray	CCND1, TP53	2	43	15	13528	41.9473	0.0455946	1	0.219788	54.0524
GO:0007565~female pregnancy	PTGS2, BCL2, IL1B	3	43	110	13528	8.58013	0.0456879	1	0.219525	54.1273
GO:0050867~positive regulation of cell activation	IL6, IL1B, CD40	3	43	111	13528	8.50283	0.0464365	1	0.22209	54.7232
GO:0048534~hemopoietic or lymphoid organ development	TNF, BCL2, TP53, SOD2	4	43	260	13528	4.84007	0.0465065	1	0.221722	54.7786
GO:0051252~regulation of RNA metabolic process	E2F1, IL6, CDKN1B, TNF, HMOX1, ESR1, TP53, NFKBIA, DNMT3B, SOD2, ENO1	11	43	1813	13528	1.9088	0.047154	1	0.223827	55.2877
GO:0042742~defense response to bacterium	IL6, TNF, CCL20	3	43	112	13528	8.42691	0.0471896	1	0.223309	55.3155
GO:0008406~gonad development	CCND1, BCL2, NOS3	3	43	112	13528	8.42691	0.0471896	1	0.223309	55.3155
GO:0003006~reproductive developmental process	CCND1, PTGS2, BCL2, NOS3	4	43	262	13528	4.80312	0.0473918	1	0.223503	55.4733
GO:0030282~bone mineralization	PTGS2, GPNMB	2	43	16	13528	39.3256	0.048561	1	0.227779	56.3752
GO:0033280~response to vitamin D	PTGS2, IL1B	2	43	16	13528	39.3256	0.048561	1	0.227779	56.3752
GO:0022612~gland morphogenesis	EGFR, BCL2	2	43	16	13528	39.3256	0.048561	1	0.227779	56.3752
GO:0051412~response to corticosterone stimulus	CCND1, BCL2	2	43	16	13528	39.3256	0.048561	1	0.227779	56.3752
GO:0051052~regulation of DNA metabolic process	TP53, CD40, AREG	3	43	114	13528	8.27907	0.0487093	1	0.22773	56.4885
GO:0000122~negative regulation of transcription from RNA polymerase II promoter	E2F1, TNF, TP53, ENO1	4	43	266	13528	4.7309	0.0491877	1	0.229063	56.8516
GO:0006790~sulfur metabolic process	MTHFR, DNMT3B, SOD2	3	43	115	13528	8.20708	0.0494759	1	0.229593	57.0691
GO:0035094~response to nicotine	HMOX1, BCL2	2	43	17	13528	37.0123	0.0515184	1	0.237374	58.5807
GO:0031575~G1/S transition checkpoint	CCND1, TP53	2	43	17	13528	37.0123	0.0515184	1	0.237374	58.5807
GO:0046330~positive regulation of JNK cascade	TNF, IL1B	2	43	17	13528	37.0123	0.0515184	1	0.237374	58.5807
GO:0043200~response to amino acid stimulus	CFL1, NOS3	2	43	17	13528	37.0123	0.0515184	1	0.237374	58.5807
GO:0002520~immune system development	TNF, BCL2, TP53, SOD2	4	43	276	13528	4.55949	0.0538228	1	0.24611	60.2262
GO:0030593~neutrophil chemotaxis	CXCL3, IL1B	2	43	18	13528	34.9561	0.0544668	1	0.248015	60.6749
GO:0019915~lipid storage	TNF, IL1B	2	43	18	13528	34.9561	0.0544668	1	0.248015	60.6749
GO:0002718~regulation of cytokine production during immune response	TNF, HMOX1	2	43	18	13528	34.9561	0.0544668	1	0.248015	60.6749
GO:0042345~regulation of NF-kappaB import into nucleus	TNF, NFKBIA	2	43	18	13528	34.9561	0.0544668	1	0.248015	60.6749
GO:0051966~regulation of synaptic transmission, glutamatergic	EGFR, PTGS2	2	43	19	13528	33.1163	0.0574063	1	0.259102	62.6633
GO:0006281~DNA repair	XRCC3, TP53, TOP2A, SOD2	4	43	284	13528	4.43105	0.0576786	1	0.259453	62.8427
GO:0048608~reproductive structure development	CCND1, BCL2, NOS3	3	43	126	13528	7.49059	0.0581926	1	0.260759	63.179
GO:0045137~development of primary sexual characteristics	CCND1, BCL2, NOS3	3	43	127	13528	7.43161	0.05901	1	0.263249	63.7079
GO:0045893~positive regulation of transcription, DNA-dependent	E2F1, IL6, TNF, TP53, NFKBIA	5	43	477	13528	3.29774	0.0596068	1	0.264854	64.0896
GO:0048511~rhythmic process	EGFR, BCL2, NOS3	3	43	128	13528	7.37355	0.0598314	1	0.264996	64.2323
GO:0048678~response to axon injury	BCL2, SOD2	2	43	20	13528	31.4605	0.0603368	1	0.266229	64.5513
GO:0051385~response to mineralocorticoid stimulus	CCND1, BCL2	2	43	20	13528	31.4605	0.0603368	1	0.266229	64.5513
GO:0006805~xenobiotic metabolic process	CYP1A1, NQO1	2	43	20	13528	31.4605	0.0603368	1	0.266229	64.5513
GO:0051607~defense response to virus	IL6, BCL2	2	43	20	13528	31.4605	0.0603368	1	0.266229	64.5513
GO:0042312~regulation of vasodilation	HMOX1, NOS3	2	43	20	13528	31.4605	0.0603368	1	0.266229	64.5513
GO:0051254~positive regulation of RNA metabolic process	E2F1, IL6, TNF, TP53, NFKBIA	5	43	481	13528	3.27032	0.0610987	1	0.268443	65.0273
GO:0017038~protein import	TNF, TP53, NFKBIA	3	43	131	13528	7.20469	0.0623196	1	0.272402	65.7775
GO:0002521~leukocyte differentiation	TNF, BCL2, TP53	3	43	131	13528	7.20469	0.0623196	1	0.272402	65.7775
GO:0070304~positive regulation of stress-activated protein kinase signaling pathway	TNF, IL1B	2	43	21	13528	29.9623	0.0632585	1	0.275245	66.344
GO:0001659~temperature homeostasis	GPX2, IL1B	2	43	21	13528	29.9623	0.0632585	1	0.275245	66.344
GO:0048609~reproductive process in a multicellular organism	EGFR, PTGS2, CYP1A1, BCL2, NOS3	5	43	487	13528	3.23003	0.0633741	1	0.274939	66.4131
GO:0032504~multicellular organism reproduction	EGFR, PTGS2, CYP1A1, BCL2, NOS3	5	43	487	13528	3.23003	0.0633741	1	0.274939	66.4131
GO:0046824~positive regulation of nucleocytoplasmic transport	TNF, IL1B	2	43	22	13528	28.6004	0.0661713	1	0.284745	68.0462
GO:0045930~negative regulation of mitotic cell cycle	EGFR, BCL2	2	43	22	13528	28.6004	0.0661713	1	0.284745	68.0462
GO:0022407~regulation of cell-cell adhesion	TNF, IL1B	2	43	22	13528	28.6004	0.0661713	1	0.284745	68.0462
GO:0050804~regulation of synaptic transmission	EGFR, TNF, PTGS2	3	43	136	13528	6.93981	0.0665443	1	0.285378	68.2582
GO:0001755~neural crest cell migration	EDNRB, CFL1	2	43	23	13528	27.3569	0.0690753	1	0.294003	69.6623
GO:0045727~positive regulation of translation	IL6, TNF	2	43	23	13528	27.3569	0.0690753	1	0.294003	69.6623
GO:0009410~response to xenobiotic stimulus	CYP1A1, NQO1	2	43	23	13528	27.3569	0.0690753	1	0.294003	69.6623
GO:0043405~regulation of MAP kinase activity	EGFR, TNF, IL1B	3	43	141	13528	6.69372	0.0708627	1	0.299783	70.6186
GO:0006259~DNA metabolic process	XRCC3, TP53, TOP2A, DNMT3B, SOD2	5	43	506	13528	3.10874	0.070875	1	0.299043	70.6251
GO:0051785~positive regulation of nuclear division	TNF, IL1B	2	43	25	13528	25.1684	0.0748567	1	0.312633	72.6539
GO:0042743~hydrogen peroxide metabolic process	CYP1A1, SOD2	2	43	25	13528	25.1684	0.0748567	1	0.312633	72.6539
GO:0045840~positive regulation of mitosis	TNF, IL1B	2	43	25	13528	25.1684	0.0748567	1	0.312633	72.6539
GO:0045862~positive regulation of proteolysis	TNF, IL1B	2	43	25	13528	25.1684	0.0748567	1	0.312633	72.6539
GO:0033365~protein localization in organelle	TNF, TP53, NFKBIA	3	43	146	13528	6.46448	0.0752712	1	0.313307	72.8573
GO:0051969~regulation of transmission of nerve impulse	EGFR, TNF, PTGS2	3	43	147	13528	6.4205	0.0761634	1	0.315672	73.2904
GO:0006917~induction of apoptosis	CDKN1B, TNF, HMOX1, TP53	4	43	320	13528	3.93256	0.0765963	1	0.316397	73.4983
GO:0051249~regulation of lymphocyte activation	IL6, IL1B, CD40	3	43	148	13528	6.37712	0.0770589	1	0.317222	73.7187
GO:0001525~angiogenesis	HMOX1, IL1B, NOS3	3	43	148	13528	6.37712	0.0770589	1	0.317222	73.7187
GO:0012502~induction of programmed cell death	CDKN1B, TNF, HMOX1, TP53	4	43	321	13528	3.92031	0.0771572	1	0.316762	73.7652
GO:0042311~vasodilation	EDNRB, SOD2	2	43	26	13528	24.2004	0.0777343	1	0.317982	74.0373
GO:0045766~positive regulation of angiogenesis	IL1B, NOS3	2	43	26	13528	24.2004	0.0777343	1	0.317982	74.0373
GO:0051353~positive regulation of oxidoreductase activity	TNF, IL1B	2	43	26	13528	24.2004	0.0777343	1	0.317982	74.0373
GO:0050994~regulation of lipid catabolic process	TNF, IL1B	2	43	26	13528	24.2004	0.0777343	1	0.317982	74.0373
GO:0007548~sex differentiation	CCND1, BCL2, NOS3	3	43	151	13528	6.25042	0.079766	1	0.324243	74.9741
GO:0033077~T cell differentiation in the thymus	BCL2, TP53	2	43	27	13528	23.304	0.0806032	1	0.326321	75.3509
GO:0045732~positive regulation of protein catabolic process	TNF, IL1B	2	43	27	13528	23.304	0.0806032	1	0.326321	75.3509
GO:0003044~regulation of systemic arterial blood pressure mediated by a chemical signal	NOS3, SOD2	2	43	27	13528	23.304	0.0806032	1	0.326321	75.3509
GO:0006006~glucose metabolic process	ALDOA, TNF, ENO1	3	43	153	13528	6.16872	0.0815873	1	0.328886	75.7869
GO:0007173~epidermal growth factor receptor signaling pathway	EGFR, AREG	2	43	28	13528	22.4718	0.0834633	1	0.33446	76.598
GO:0045833~negative regulation of lipid metabolic process	TNF, IL1B	2	43	28	13528	22.4718	0.0834633	1	0.33446	76.598
GO:0006913~nucleocytoplasmic transport	TNF, TP53, NFKBIA	3	43	156	13528	6.05009	0.0843436	1	0.336614	76.9698
GO:0009792~embryonic development ending in birth or egg hatching	ADAM10, CYP1A1, CFL1, TP53	4	43	334	13528	3.76772	0.0846145	1	0.336703	77.083
GO:0051169~nuclear transport	TNF, TP53, NFKBIA	3	43	158	13528	5.97351	0.086197	1	0.341181	77.7344
GO:0006778~porphyrin metabolic process	CYP1A1, HMOX1	2	43	29	13528	21.6969	0.0863148	1	0.340747	77.7822
GO:0033013~tetrapyrrole metabolic process	CYP1A1, HMOX1	2	43	29	13528	21.6969	0.0863148	1	0.340747	77.7822
GO:0050921~positive regulation of chemotaxis	IL6, ADAM10	2	43	29	13528	21.6969	0.0863148	1	0.340747	77.7822
GO:0048666~neuron development	EGFR, IL6, BCL2, SOD2	4	43	339	13528	3.71215	0.0875635	1	0.344065	78.2828
GO:0007566~embryo implantation	PTGS2, IL1B	2	43	30	13528	20.9736	0.0891575	1	0.348487	78.9065
GO:0042990~regulation of transcription factor import into nucleus	TNF, NFKBIA	2	43	30	13528	20.9736	0.0891575	1	0.348487	78.9065
GO:0045768~positive regulation of anti-apoptosis	IL6, HMOX1	2	43	30	13528	20.9736	0.0891575	1	0.348487	78.9065
GO:0032388~positive regulation of intracellular transport	TNF, IL1B	2	43	30	13528	20.9736	0.0891575	1	0.348487	78.9065
GO:0050920~regulation of chemotaxis	IL6, ADAM10	2	43	31	13528	20.2971	0.0919917	1	0.356889	79.974
GO:0006575~cellular amino acid derivative metabolic process	CYP1A1, DNMT3B, SOD2	3	43	166	13528	5.68563	0.0937334	1	0.36166	80.6046
GO:0050767~regulation of neurogenesis	BCL2, TP53, DNMT3B	3	43	166	13528	5.68563	0.0937334	1	0.36166	80.6046
GO:0030168~platelet activation	IL6, CD40	2	43	32	13528	19.6628	0.0948172	1	0.364281	80.9875
GO:0007006~mitochondrial membrane organization	BCL2, TP53	2	43	32	13528	19.6628	0.0948172	1	0.364281	80.9875
GO:0045941~positive regulation of transcription	E2F1, IL6, TNF, TP53, NFKBIA	5	43	564	13528	2.78905	0.0964776	1	0.368708	81.5604
GO:0014033~neural crest cell differentiation	EDNRB, CFL1	2	43	33	13528	19.0669	0.0976342	1	0.371503	81.9498
GO:0007569~cell aging	BCL2, TP53	2	43	33	13528	19.0669	0.0976342	1	0.371503	81.9498
GO:0008630~DNA damage response, signal transduction resulting in induction of apoptosis	HMOX1, TP53	2	43	33	13528	19.0669	0.0976342	1	0.371503	81.9498
GO:0014032~neural crest cell development	EDNRB, CFL1	2	43	33	13528	19.0669	0.0976342	1	0.371503	81.9498
GO:0050871~positive regulation of B cell activation	IL6, CD40	2	43	33	13528	19.0669	0.0976342	1	0.371503	81.9498
